# Supplementary material for: Microwave-assisted synthesis of novel hetero[5]helicene-like molecules and coumarin derivatives
Source: Royal Society of Chemistry journal article supplement (doi:10.1039/c7ob01742a), 2017-01-01

*Supporting Information*

## **Microwave-assisted synthesis of novel hetero[5]helicene-like molecules and coumarin derivatives**

Wei Lin, Xiuxiu Hu, Shuai Song, Qi Cai, Yun Wang, Daqing Shi

### **Contents**

|                                                            |    |
|------------------------------------------------------------|----|
| 1. Crystal data of compounds <b>3a</b> and <b>4a</b> ..... | S2 |
| 2. <sup>1</sup> H NMR and <sup>13</sup> C NMR Spectra..... | S7 |

#### **1. Crystal data of compounds 3a and 4a**

## A. Crystal data of compound 3a

Table 1. Crystal data and structure refinement for 3a CCDC 1561314

|                                   |                                                               |
|-----------------------------------|---------------------------------------------------------------|
| Empirical formula                 | C <sub>27</sub> H <sub>21</sub> N <sub>3</sub> O <sub>2</sub> |
| Formula weight                    | 419.47                                                        |
| Temperature                       | 298(2) K                                                      |
| Wavelength                        | 0.71073 Å                                                     |
| Crystal system, space group       | Monoclinic, P2(1)/c                                           |
| Unit cell dimensions              | a = 10.0070(9) Å    alpha = 90 deg.                           |
|                                   | b = 11.0039(11) Å    beta = 105.024(2) deg.                   |
|                                   | c = 18.1201(16) Å    gamma = 90 deg.                          |
| Volume                            | 1927.1(3) Å <sup>3</sup>                                      |
| Z, Calculated density             | 4, 1.446 Mg/m <sup>3</sup>                                    |
| Absorption coefficient            | 0.093 mm <sup>-1</sup>                                        |
| F(000)                            | 880                                                           |
| Crystal size                      | 0.18 x 0.14 x 0.13 mm                                         |
| Theta range for data collection   | 2.70 to 25.02 deg.                                            |
| Limiting indices                  | -11 ≤ h ≤ 11, -13 ≤ k ≤ 11, -20 ≤ l ≤ 21                      |
| Reflections collected / unique    | 9567 / 3374 [R(int) = 0.1236]                                 |
| Completeness to theta = 25.02     | 99.5 %                                                        |
| Absorption correction             | Semi-empirical from equivalents                               |
| Max. and min. transmission        | 0.9880 and 0.9835                                             |
| Refinement method                 | Full-matrix least-squares on F <sup>2</sup>                   |
| Data / restraints / parameters    | 3374 / 0 / 321                                                |
| Goodness-of-fit on F <sup>2</sup> | 1.053                                                         |
| Final R indices [I > 2σ(I)]       | R1 = 0.0752, wR2 = 0.1788                                     |
| R indices (all data)              | R1 = 0.4187, wR2 = 0.2666                                     |
| Extinction coefficient            | 0.013(3)                                                      |
| Largest diff. peak and hole       | 0.270 and -0.246 e.Å <sup>-3</sup>                            |

Table 2. Selected bond lengths (Å) of compound 3a

| Bond       | Bond Lengths | Bond         | Bond Lengths | Bond          | Bond Lengths |
|------------|--------------|--------------|--------------|---------------|--------------|
| N(1)-C(18) | 1.335(6)     | C(9)-C(10)   | 1.368(7)     | C(16')-H(16C) | 0.9700       |
| N(1)-N(2)  | 1.337(5)     | C(10)-C(11)  | 1.346(7)     | C(16')-H(16D) | 0.9700       |
| N(1)-C(22) | 1.375(6)     | C(10)-H(10)  | 0.9300       | C(17')-H(17D) | 0.9600       |
| N(2)-C(20) | 1.294(6)     | C(11)-C(12)  | 1.360(8)     | C(17')-H(17E) | 0.9600       |
| N(3)-C(14) | 1.309(7)     | C(11)-H(11)  | 0.9300       | C(17')-H(17F) | 0.9600       |
| N(3)-C(18) | 1.313(6)     | C(12)-C(13)  | 1.315(9)     | C(18)-C(19)   | 1.356(7)     |
| O(1)-C(5)  | 1.337(6)     | C(12)-H(12)  | 0.9300       | C(19)-C(20)   | 1.402(6)     |
| O(1)-C(1)  | 1.340(7)     | C(13)-H(13)  | 0.9300       | C(20)-C(21)   | 1.452(6)     |
| O(2)-C(1)  | 1.175(6)     | C(14)-C(15)  | 1.501(17)    | C(21)-H(21A)  | 0.9600       |
| C(1)-C(2)  | 1.429(8)     | C(14)-C(15') | 1.53(5)      | C(21)-H(21B)  | 0.9600       |
| C(2)-C(3)  | 1.371(7)     | C(15)-C(16)  | 1.50(2)      | C(21)-H(21C)  | 0.9600       |

## Supporting Information

|            |          |               |         |             |          |
|------------|----------|---------------|---------|-------------|----------|
| C(2)-C(14) | 1.370(7) | C(15)-H(15A)  | 0.9700  | C(22)-C(27) | 1.362(8) |
| C(3)-C(19) | 1.380(7) | C(15)-H(15B)  | 0.9700  | C(22)-C(23) | 1.363(8) |
| C(3)-C(4)  | 1.418(7) | C(16)-C(17)   | 1.52(3) | C(23)-C(24) | 1.369(8) |
| C(4)-C(5)  | 1.352(7) | C(16)-H(16A)  | 0.9700  | C(23)-H(23) | 0.9300   |
| C(4)-C(9)  | 1.400(7) | C(16)-H(16B)  | 0.9700  | C(24)-C(25) | 1.362(9) |
| C(5)-C(6)  | 1.358(7) | C(17)-H(17A)  | 0.9600  | C(24)-H(24) | 0.9300   |
| C(6)-C(7)  | 1.315(8) | C(17)-H(17B)  | 0.9600  | C(25)-C(26) | 1.364(8) |
| C(6)-H(6)  | 0.9300   | C(17)-H(17C)  | 0.9600  | C(25)-H(25) | 0.9300   |
| C(7)-C(8)  | 1.380(8) | C(15')-C(16') | 1.53(7) | C(26)-C(27) | 1.363(8) |
| C(7)-H(7)  | 0.9300   | C(15')-H(15C) | 0.9700  | C(26)-H(26) | 0.9300   |
| C(8)-C(13) | 1.386(8) | C(15')-H(15D) | 0.9700  | C(27)-H(27) | 0.9300   |
| C(8)-C(9)  | 1.390(7) | C(16')-C(17') | 1.51(7) |             |          |

**Table 3.** Selected bond angles (°) of compound **3a**

| Angles           | (°)       | Angles               | (°)       |
|------------------|-----------|----------------------|-----------|
| C(18)-N(1)-N(2)  | 110.0(4)  | C(10)-C(9)-C(4)      | 122.7(5)  |
| C(18)-N(1)-C(22) | 131.4(4)  | C(8)-C(9)-C(4)       | 118.7(5)  |
| N(2)-N(1)-C(22)  | 118.7(4)  | C(11)-C(10)-C(9)     | 120.8(6)  |
| C(20)-N(2)-N(1)  | 107.4(4)  | C(10)-C(11)-C(12)    | 120.4(7)  |
| C(14)-N(3)-C(18) | 113.6(5)  | C(13)-C(12)-C(11)    | 120.3(6)  |
| C(5)-O(1)-C(1)   | 121.4(5)  | C(12)-C(13)-C(8)     | 121.1(6)  |
| C(18)-N(1)-N(2)  | 109.8(4)  | N(3)-C(14)-C(2)      | 123.6(5)  |
| O(2)-C(1)-O(1)   | 115.9(6)  | N(3)-C(14)-C(15)     | 113.4(6)  |
| O(2)-C(1)-C(2)   | 127.2(6)  | C(2)-C(14)-C(15)     | 122.3(6)  |
| O(1)-C(1)-C(2)   | 116.6(5)  | N(3)-C(14)-C(15')    | 106.5(12) |
| C(3)-C(2)-C(14)  | 120.6(5)  | C(2)-C(14)-C(15')    | 122.8(12) |
| C(3)-C(2)-C(1)   | 118.5(5)  | C(15)-C(14)-C(15')   | 37.4(13)  |
| C(14)-C(2)-C(1)  | 120.7(5)  | C(16)-C(15)-C(14)    | 107.8(12) |
| C(2)-C(3)-C(19)  | 115.1(5)  | C(15)-C(16)-C(17)    | 109.4(15) |
| C(2)-C(3)-C(4)   | 118.2(5)  | C(14)-C(15)-C(16')   | 107(4)    |
| C(19)-C(3)-C(4)  | 126.6(5)  | C(17')-C(16')-C(15') | 115(4)    |
| C(5)-C(4)-C(9)   | 117.2(5)  | N(3)-C(18)-N(1)      | 124.2(5)  |
| C(5)-C(4)-C(3)   | 116.5(5)  | N(3)-C(18)-C(19)     | 127.8(5)  |
| C(9)-C(4)-C(3)   | 126.1(5)  | N(1)-C(18)-C(19)     | 107.9(4)  |
| O(1)-C(5)-C(4)   | 121.2(5)  | C(18)-C(19)-C(3)     | 117.3(5)  |
| O(1)-C(5)-C(6)   | 115.7(5)  | C(18)-C(19)-C(20)    | 104.4(5)  |
| C(4)-C(5)-C(6)   | 123.1(6)  | C(3)-C(19)-C(20)     | 137.9(5)  |
| C(7)-C(6)-C(5)   | 118.87(6) | N(2)-C(20)-C(19)     | 110.1(5)  |
| C(7)-C(6)-H(6)   | 120.6     | N(2)-C(20)-C(21)     | 117.5(5)  |
| C(5)-C(6)-H(6)   | 120.6     | C(19)-C(20)-C(21)    | 131.9(5)  |
| C(6)-C(7)-C(8)   | 121.8(6)  | C(27)-C(22)-C(23)    | 120.9(5)  |
| C(6)-C(7)-H(7)   | 119.1     | C(27)-C(22)-N(1)     | 119.0(5)  |
| C(8)-C(7)-H(7)   | 119.1     | C(23)-C(22)-N(1)     | 120.4(5)  |
| C(7)-C(8)-C(13)  | 122.2(6)  | C(22)-C(23)-C(24)    | 119.1(6)  |

Supporting Information

|                 |          |                   |          |
|-----------------|----------|-------------------|----------|
| C(7)-C(8)-C(9)  | 119.0(6) | C(25)-C(24)-C(23) | 120.6(7) |
| C(13)-C(8)-C(9) | 118.7(6) | C(24)-C(25)-C(26) | 119.5(6) |
| C(10)-C(9)-C(8) | 118.2(6) | C(25)-C(26)-C(27) | 120.6(6) |
|                 |          | C(22)-C(27)-C(26) | 119.3(6) |

**B. Crystal data of compound 4a**

Table 4. Crystal data and structure refinement for **4a** CCDC 1561315

|                                   |                                                  |
|-----------------------------------|--------------------------------------------------|
| Empirical formula                 | C <sub>27</sub> H <sub>23</sub> N <sub>3</sub> O |
| Formula weight                    | 405.48                                           |
| Temperature                       | 298(2) K                                         |
| Wavelength                        | 0.71073 Å                                        |
| Crystal system, space group       | Triclinic, P-1                                   |
| Unit cell dimensions              | a = 10.8840(9) Å    alpha = 104.061(2)deg.       |
|                                   | b = 14.4830(13) Å    beta = 106.620(2) deg.      |
|                                   | c = 14.9970(12) Å    gamma = 100.8970(10) deg.   |
| Volume                            | 2110.7(3) Å <sup>3</sup>                         |
| Z, Calculated density             | 4, 1.276 Mg/m <sup>3</sup>                       |
| Absorption coefficient            | 0.079 mm <sup>-1</sup>                           |
| F(000)                            | 856                                              |
| Crystal size                      | 0.38 x 0.21 x 0.11 mm                            |
| Theta range for data collection   | 2.85 to 25.02 deg.                               |
| Limiting indices                  | -12 ≤ h ≤ 8, -17 ≤ k ≤ 17, -17 ≤ l ≤ 17          |
| Reflections collected / unique    | 10773 / 7310 [R(int) = 0.0271]                   |
| Completeness to theta = 25.02     | 98.1 %                                           |
| Absorption correction             | Semi-empirical from equivalents                  |
| Max. and min. transmission        | 0.9914 and 0.9706                                |
| Refinement method                 | Full-matrix least-squares on F <sup>2</sup>      |
| Data / restraints / parameters    | 7310 / 0 / 563                                   |
| Goodness-of-fit on F <sup>2</sup> | 1.052                                            |
| Final R indices [I > 2σ(I)]       | R1 = 0.0527, wR2 = 0.0931                        |
| R indices (all data)              | R1 = 0.1150, wR2 = 0.1069                        |
| Largest diff. peak and hole       | 0.172 and -0.280 e.Å <sup>-3</sup>               |

**Table 5.** Selected bond lengths (Å) of compound **4a**

| Bond       | Bond Lengths | Bond        | Bond Lengths | Bond        | Bond Lengths |
|------------|--------------|-------------|--------------|-------------|--------------|
| N(1)-C(5)  | 1.331(3)     | C(6)-C(7)   | 1.396(3)     | C(29)-C(30) | 1.496(3)     |
| N(1)-C(6)  | 1.345(2)     | C(7)-C(8)   | 1.433(3)     | C(30)-C(31) | 1.504(3)     |
| N(2)-C(6)  | 1.378(3)     | C(8)-C(9)   | 1.499(3)     | C(31)-C(37) | 1.392(3)     |
| N(2)-N(3)  | 1.387(2)     | C(10)-C(11) | 1.507(3)     | C(31)-C(32) | 1.405(3)     |
| N(2)-C(22) | 1.423(3)     | C(11)-C(12) | 1.526(3)     | C(33)-C(34) | 1.401(3)     |
| N(3)-C(8)  | 1.320(3)     | C(12)-C(13) | 1.519(3)     | C(34)-C(37) | 1.403(3)     |

## Supporting Information

|            |          |             |          |             |          |
|------------|----------|-------------|----------|-------------|----------|
| N(4)-C(32) | 1.335(3) | C(14)-C(15) | 1.361(3) | C(34)-C(35) | 1.433(3) |
| N(4)-C(33) | 1.343(3) | C(15)-C(16) | 1.413(3) | C(35)-C(36) | 1.502(3) |
| N(5)-C(33) | 1.375(3) | C(16)-C(21) | 1.413(3) | C(37)-C(38) | 1.508(3) |
| N(5)-N(6)  | 1.392(3) | C(16)-C(17) | 1.424(3) | C(38)-C(39) | 1.539(3) |
| N(5)-C(49) | 1.417(3) | C(17)-C(18) | 1.409(3) | C(39)-C(40) | 1.500(3) |
| N(6)-C(35) | 1.323(3) | C(18)-C(19) | 1.366(3) | C(41)-C(42) | 1.363(3) |
| O(1)-C(5)  | 1.383(2) | C(19)-C(20) | 1.403(3) | C(42)-C(43) | 1.409(3) |
| O(1)-C(1)  | 1.399(2) | C(20)-C(21) | 1.358(3) | C(43)-C(48) | 1.414(3) |
| O(2)-C(32) | 1.377(3) | C(22)-C(27) | 1.380(3) | C(43)-C(44) | 1.420(3) |
| O(2)-C(28) | 1.399(2) | C(22)-C(23) | 1.383(3) | C(44)-C(45) | 1.416(3) |
| C(1)-C(2)  | 1.358(3) | C(23)-C(24) | 1.384(3) | C(45)-C(46) | 1.369(3) |
| C(1)-C(14) | 1.411(3) | C(24)-C(25) | 1.372(3) | C(46)-C(47) | 1.400(4) |
| C(2)-C(17) | 1.425(3) | C(25)-C(26) | 1.376(3) | C(47)-C(48) | 1.368(4) |
| C(2)-C(3)  | 1.508(3) | C(26)-C(27) | 1.377(3) | C(49)-C(50) | 1.377(3) |
| C(3)-C(4)  | 1.513(3) | C(27)-H(27) | 0.9300   | C(49)-C(54) | 1.384(3) |
| C(4)-C(10) | 1.393(3) | C(28)-C(29) | 1.352(3) | C(50)-C(51) | 1.383(3) |
| C(4)-C(5)  | 1.400(3) | C(28)-C(41) | 1.411(3) | C(51)-C(52) | 1.373(3) |
|            |          |             |          | C(52)-C(53) | 1.378(4) |

**Table 6.** Selected bond angles (°) of compound **4a**

| Angles           | (°)        | Angles            | (°)      |
|------------------|------------|-------------------|----------|
| C(5)-N(1)-C(6)   | 112.44(19) | C(24)-C(25)-C(26) | 118.4(3) |
| C(6)-N(2)-N(3)   | 109.67(19) | C(25)-C(26)-C(27) | 121.4(3) |
| C(6)-N(2)-C(22)  | 131.94(19) | C(26)-C(27)-C(22) | 119.7(2) |
| N(3)-N(2)-C(22)  | 118.37(19) | C(29)-C(28)-O(2)  | 123.5(2) |
| C(8)-N(3)-N(2)   | 106.80(19) | C(29)-C(28)-C(41) | 123.4(2) |
| C(5)-O(1)-C(1)   | 119.14(18) | O(2)-C(28)-C(41)  | 113.1(2) |
| C(32)-O(2)-C(28) | 119.10(19) | C(28)-C(29)-C(44) | 118.2(2) |
| C(2)-C(1)-O(1)   | 123.6(2)   | C(28)-C(29)-C(30) | 121.1(2) |
| C(2)-C(1)-C(14)  | 123.3(2)   | C(44)-C(29)-C(30) | 120.7(2) |
| O(1)-C(1)-C(14)  | 113.2(2)   | C(29)-C(30)-C(31) | 113.8(2) |
| C(1)-C(2)-C(17)  | 118.0(2)   | C(37)-C(31)-C(32) | 118.3(2) |
| C(1)-C(2)-C(3)   | 121.1(2)   | C(37)-C(31)-C(30) | 121.7(2) |
| C(17)-C(2)-C(3)  | 120.8(2)   | C(32)-C(31)-C(30) | 120.0(2) |
| C(2)-C(3)-C(4)   | 113.11(19) | N(4)-C(32)-O(2)   | 110.7(2) |
| C(10)-C(4)-C(5)  | 118.0(2)   | N(4)-C(32)-C(31)  | 126.8(2) |
| C(10)-C(4)-C(3)  | 121.3(2)   | O(2)-C(32)-C(31)  | 122.4(2) |
| C(5)-C(4)-C(3)   | 120.66(19) | N(4)-C(33)-N(5)   | 125.5(2) |
| N(1)-C(5)-O(1)   | 110.19(19) | N(4)-C(33)-C(34)  | 126.8(2) |
| N(1)-C(5)-C(4)   | 127.5(2)   | N(5)-C(33)-C(34)  | 107.7(2) |
| O(1)-C(5)-C(4)   | 122.3(2)   | C(33)-C(34)-C(37) | 118.0(2) |
| N(1)-C(6)-N(2)   | 125.3(2)   | C(33)-C(34)-C(35) | 104.7(2) |
| N(1)-C(6)-C(7)   | 126.7(2)   | C(37)-C(34)-C(35) | 137.2(2) |
| N(2)-C(6)-C(7)   | 107.93(19) | N(6)-C(35)-C(34)  | 110.9(2) |

*Supporting Information*

|                   |            |                   |          |
|-------------------|------------|-------------------|----------|
| C(6)-C(7)-C(10)   | 118.2(2)   | N(6)-C(35)-C(36)  | 118.4(2) |
| C(6)-C(7)-C(8)    | 104.2(2)   | C(34)-C(35)-C(36) | 130.8(2) |
| C(10)-C(7)-C(8)   | 137.6(2)   | C(31)-C(37)-C(34) | 117.2(2) |
| N(3)-C(8)-C(7)    | 111.4(2)   | C(31)-C(37)-C(38) | 120.3(2) |
| N(3)-C(8)-C(9)    | 118.8(2)   | C(34)-C(37)-C(38) | 122.4(2) |
| C(7)-C(8)-C(9)    | 129.8(2)   | C(37)-C(38)-C(39) | 112.1(2) |
| C(4)-C(10)-C(7)   | 117.1(2)   | C(40)-C(39)-C(38) | 113.2(2) |
| C(4)-C(10)-C(11)  | 122.0(2)   | C(42)-C(41)-C(28) | 118.5(3) |
| C(7)-C(10)-C(11)  | 120.87(19) | C(41)-C(42)-C(43) | 121.2(3) |
| C(10)-C(11)-C(12) | 114.34(19) | C(42)-C(43)-C(48) | 121.8(3) |
| C(13)-C(12)-C(11) | 111.9(2)   | C(42)-C(43)-C(44) | 119.1(2) |
| C(15)-C(14)-C(1)  | 118.9(2)   | C(48)-C(43)-C(44) | 119.1(3) |
| C(14)-C(15)-C(16) | 121.1(2)   | C(45)-C(44)-C(43) | 118.4(2) |
| C(15)-C(16)-C(21) | 122.2(2)   | C(45)-C(44)-C(29) | 122.1(2) |
| C(15)-C(16)-C(17) | 118.8(2)   | C(43)-C(44)-C(29) | 119.5(2) |
| C(21)-C(16)-C(17) | 118.9(3)   | C(46)-C(45)-C(44) | 121.2(3) |
| C(18)-C(17)-C(16) | 117.8(2)   | C(45)-C(46)-C(47) | 120.1(3) |
| C(18)-C(17)-C(2)  | 122.3(2)   | C(48)-C(47)-C(46) | 120.6(3) |
| C(16)-C(17)-C(2)  | 119.8(2)   | C(47)-C(48)-C(43) | 120.7(3) |
| C(19)-C(18)-C(17) | 121.9(2)   | C(50)-C(49)-C(54) | 119.5(3) |
| C(18)-C(19)-C(20) | 119.8(3)   | C(50)-C(49)-N(5)  | 121.5(2) |
| C(21)-C(20)-C(19) | 120.2(3)   | C(54)-C(49)-N(5)  | 119.0(3) |
| C(20)-C(21)-C(16) | 121.3(3)   | C(49)-C(50)-C(51) | 120.3(2) |
| C(27)-C(22)-C(23) | 119.7(2)   | C(52)-C(51)-C(50) | 120.5(3) |
| C(27)-C(22)-N(2)  | 119.4(2)   | C(51)-C(52)-C(53) | 119.0(3) |
| C(23)-C(22)-N(2)  | 120.9(2)   | C(54)-C(53)-C(52) | 121.1(3) |
| C(22)-C(23)-C(24) | 119.4(2)   | C(53)-C(54)-C(49) | 119.6(3) |
| C(25)-C(24)-C(23) | 121.4(2)   |                   |          |

---

## 2. $^1\text{H}$ NMR and $^{13}\text{C}$ NMR Spectra

$^1\text{H}$  NMR of 11-methyl-13-phenyl-2-propyl-1,2-dihydrobenzo[5,6]chromeno[4,3-*d*]pyrazolo[3,4-*b*]pyridin-3(13*H*)-one (**5**)

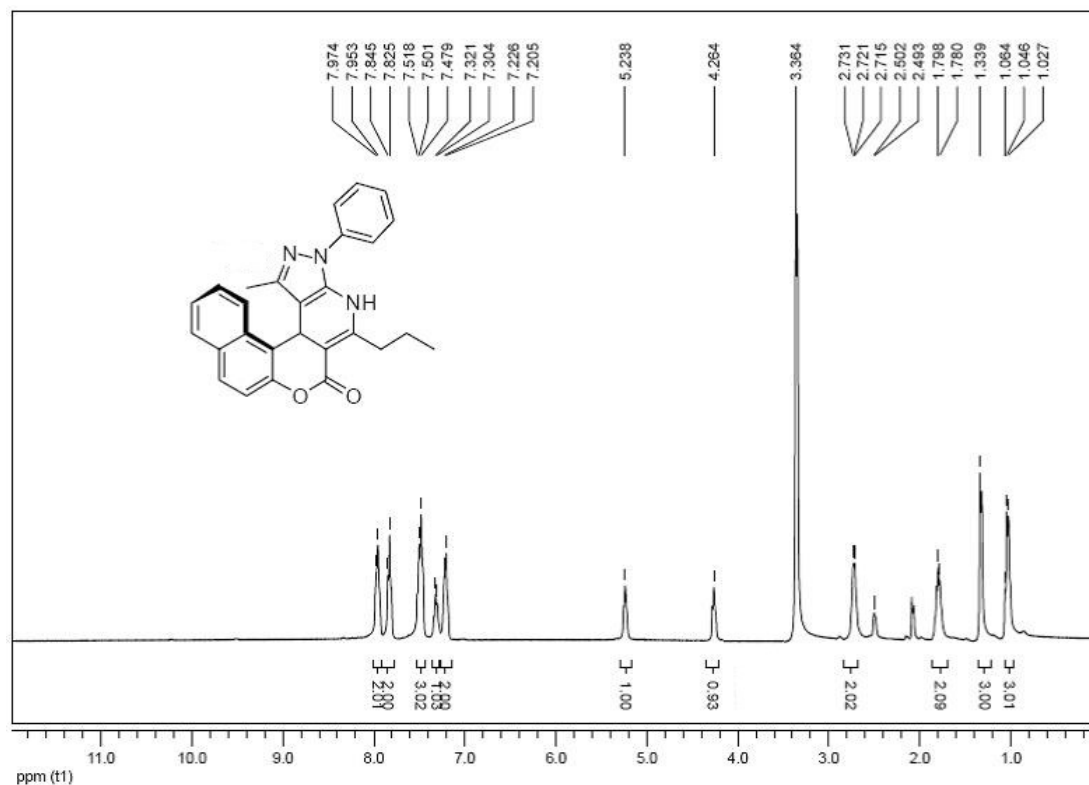

Supporting Information

$^1\text{H}$  NMR of 11-methyl-13-phenyl-2-propylbenzo[5,6]chromeno[4,3-*d*]pyrazolo[3,4-*b*]pyridin-3(13*H*)-one (**3a**)

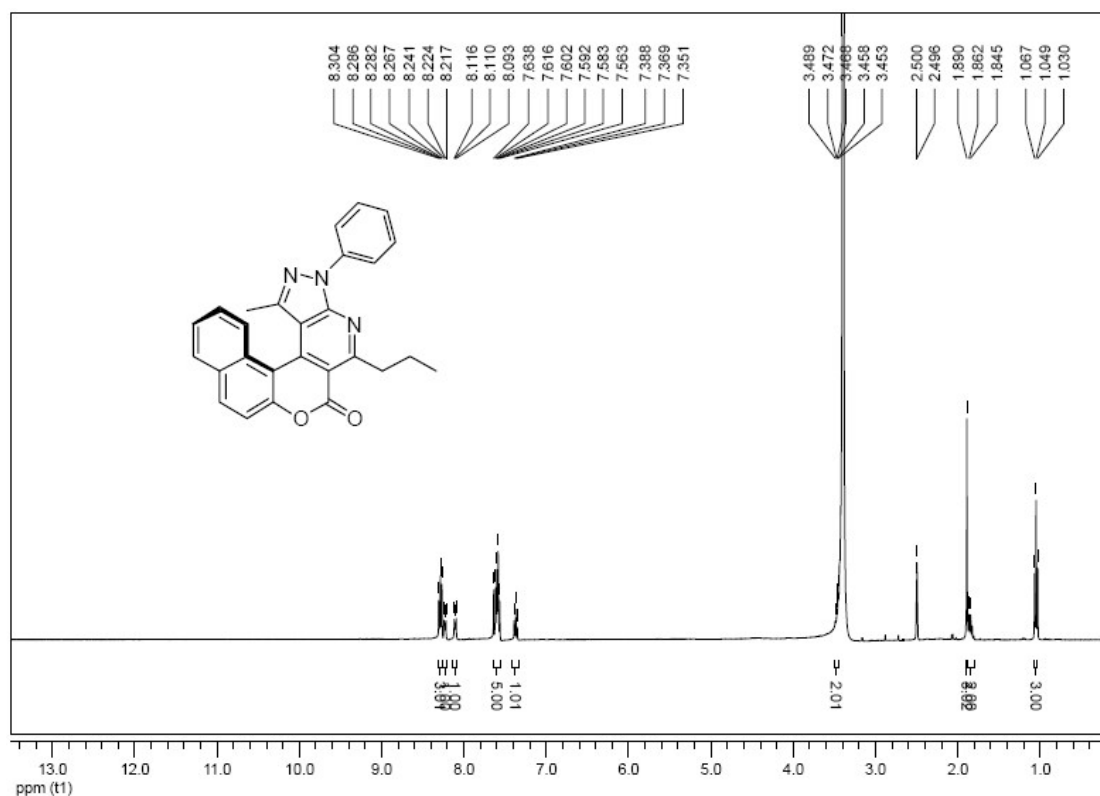

$^{13}\text{C}$  NMR of 11-methyl-13-phenyl-2-propylbenzo[5,6]chromeno[4,3-*d*]pyrazolo[3,4-*b*]pyridin-3(13*H*)-one (**3a**)

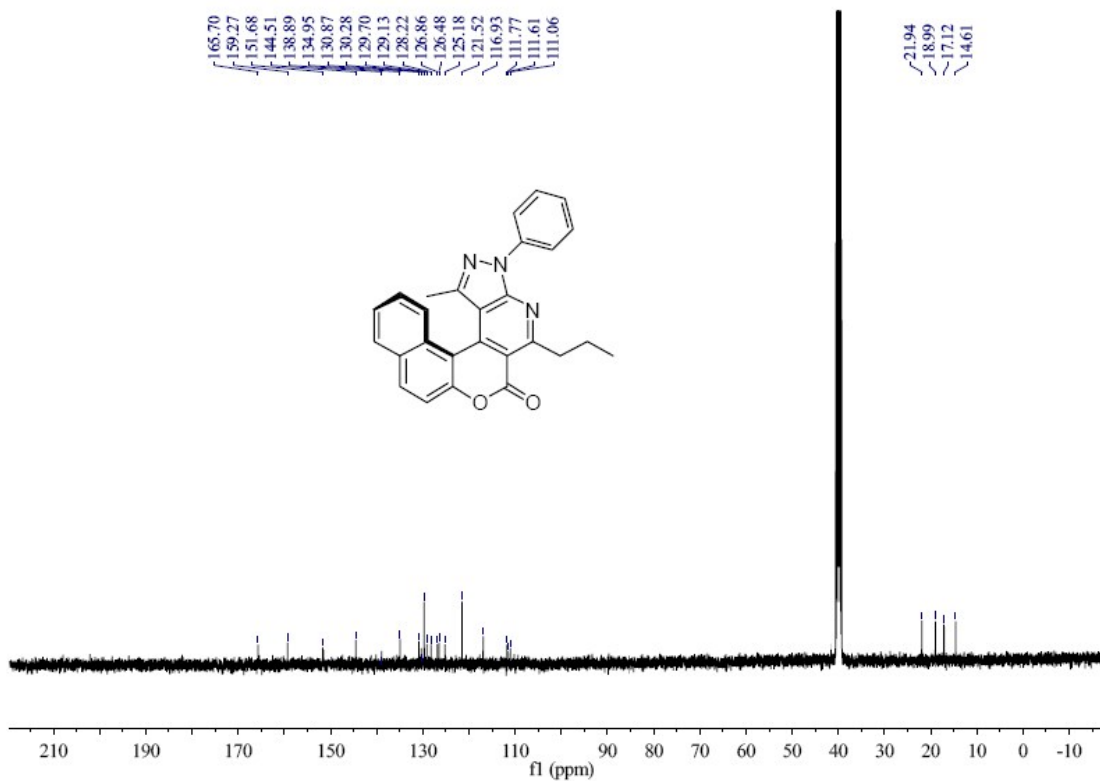



Supporting Information

<sup>1</sup>H NMR of 9-methoxy-11-methyl-13-phenyl-2-propylbenzo[5,6]chromeno[4,3-*d*]pyrazolo[3,4-*b*]pyridin-3(13*H*)-one (**3b**)

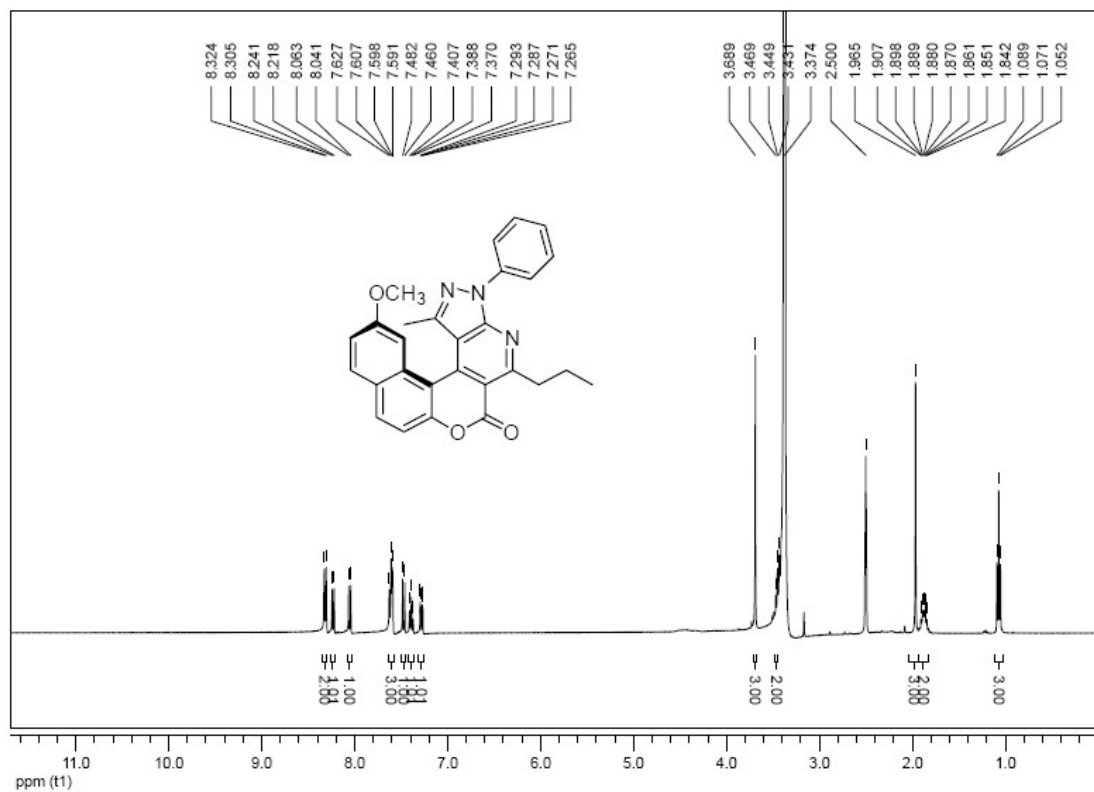

<sup>13</sup>C NMR of 9-methoxy-11-methyl-13-phenyl-2-propylbenzo[5,6]chromeno[4,3-*d*]pyrazolo[3,4-*b*]pyridin-3(13*H*)-one (**3b**)

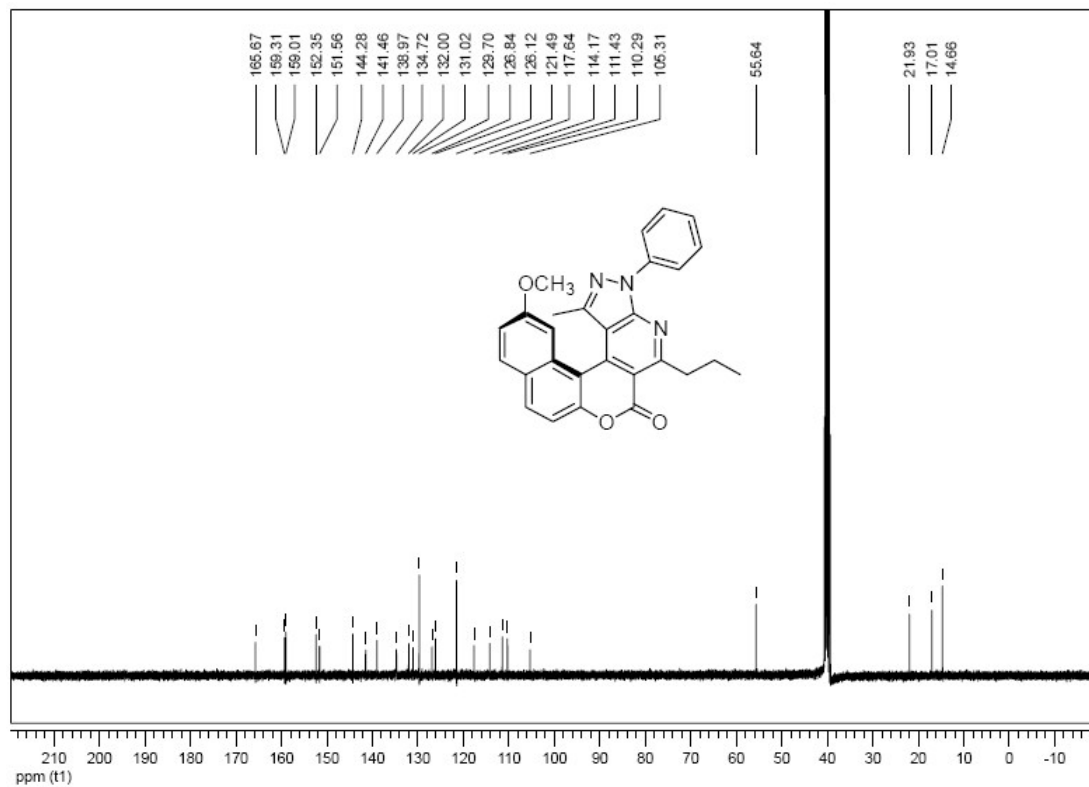

Supporting Information

$^1\text{H}$  NMR of 9-hydroxy-11-methyl-13-phenyl-2-propylbenzo[5,6]chromeno[4,3-*d*]pyrazolo[3,4-*b*]pyridin-3(13*H*)-one (**3c**)

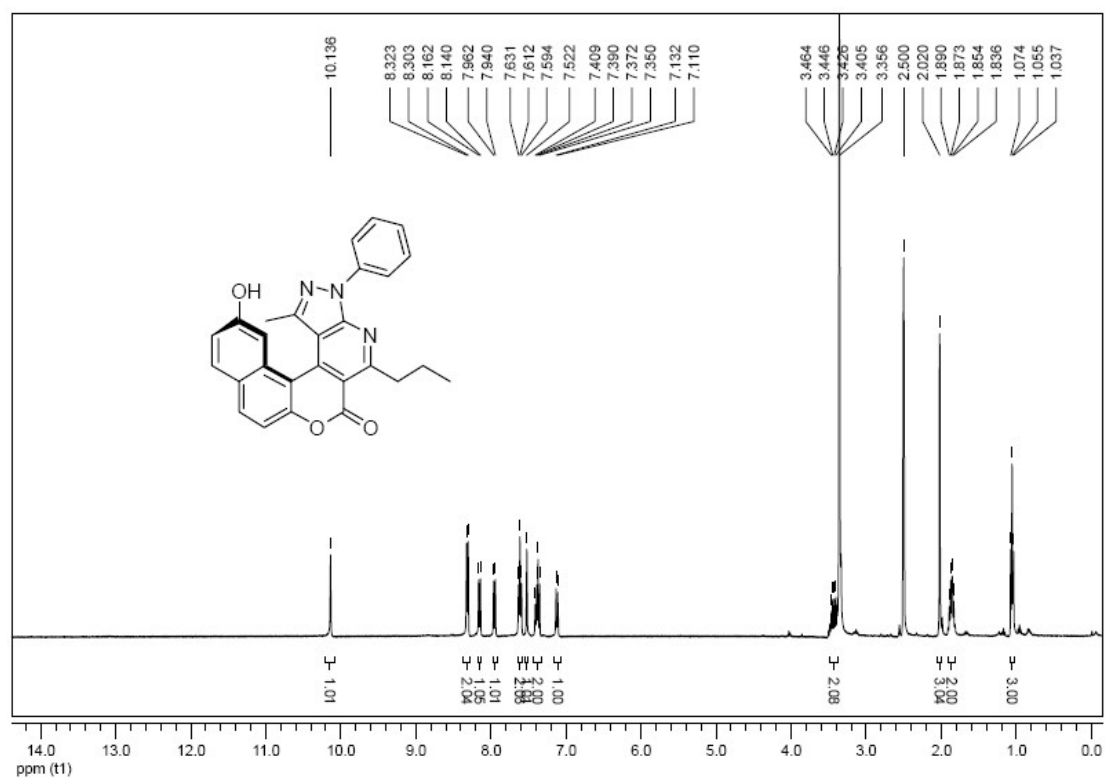

$^{13}\text{C}$  NMR of 9-hydroxy-11-methyl-13-phenyl-2-propylbenzo[5,6]chromeno[4,3-*d*]pyrazolo[3,4-*b*]pyridin-3(13*H*)-one (**3c**)

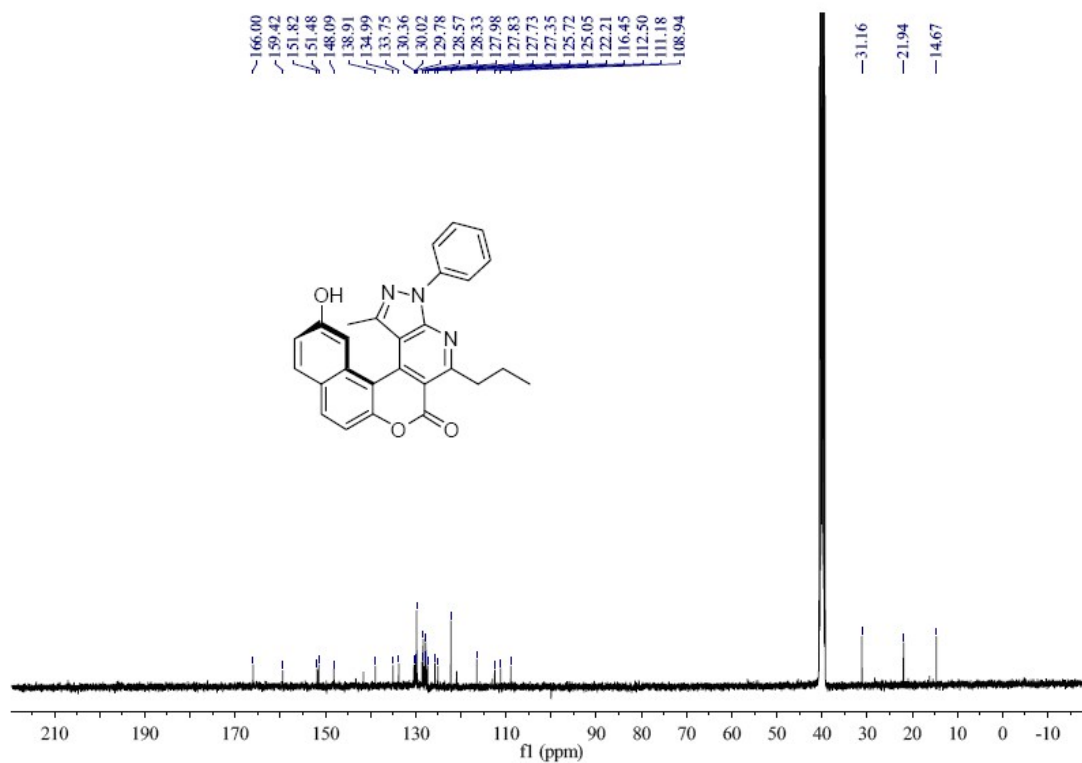

Supporting Information

<sup>1</sup>H NMR of 11,13-diphenyl-2-propylbenzo[5,6]chromeno[4,3-*d*]pyrazolo[3,4-*b*]pyridin-3(13*H*)-one (3d)

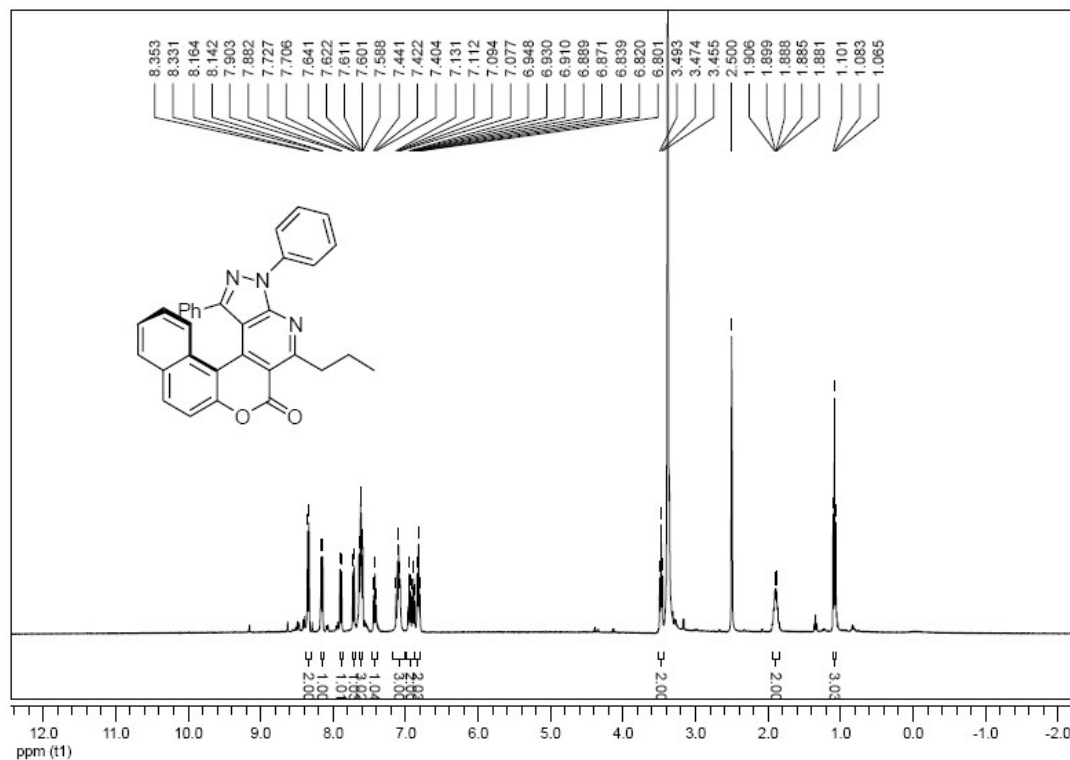

<sup>13</sup>C NMR of 11,13-diphenyl-2-propylbenzo[5,6]chromeno[4,3-*d*]pyrazolo[3,4-*b*]pyridin-3(13*H*)-one (3d)

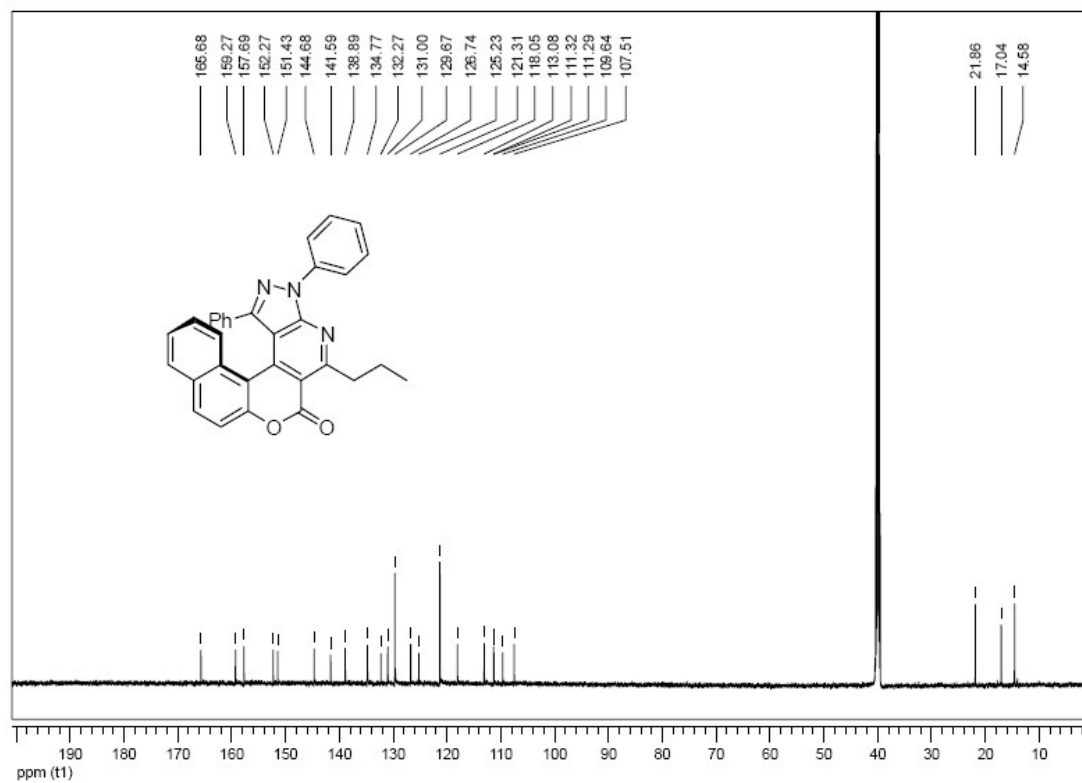

Supporting Information

$^1\text{H}$  NMR of 11-cyclopropyl-9-methoxy-13-phenyl-2-propylbenzo[5,6]chromeno[4,3-*d*]pyrazolo[3,4-*b*]pyridin-3(13*H*)-one (**3e**)

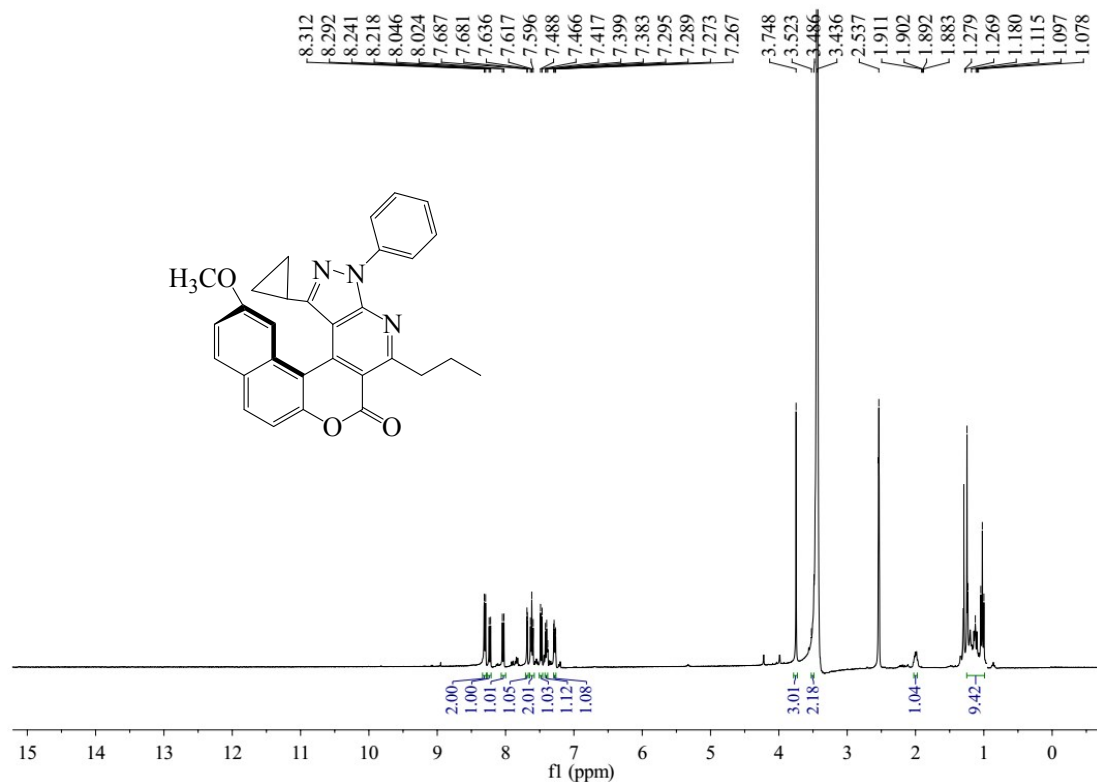

$^{13}\text{C}$  NMR of 11-cyclopropyl-9-methoxy-13-phenyl-2-propylbenzo[5,6]chromeno[4,3-*d*]pyrazolo[3,4-*b*]pyridin-3(13*H*)-one (**3e**)

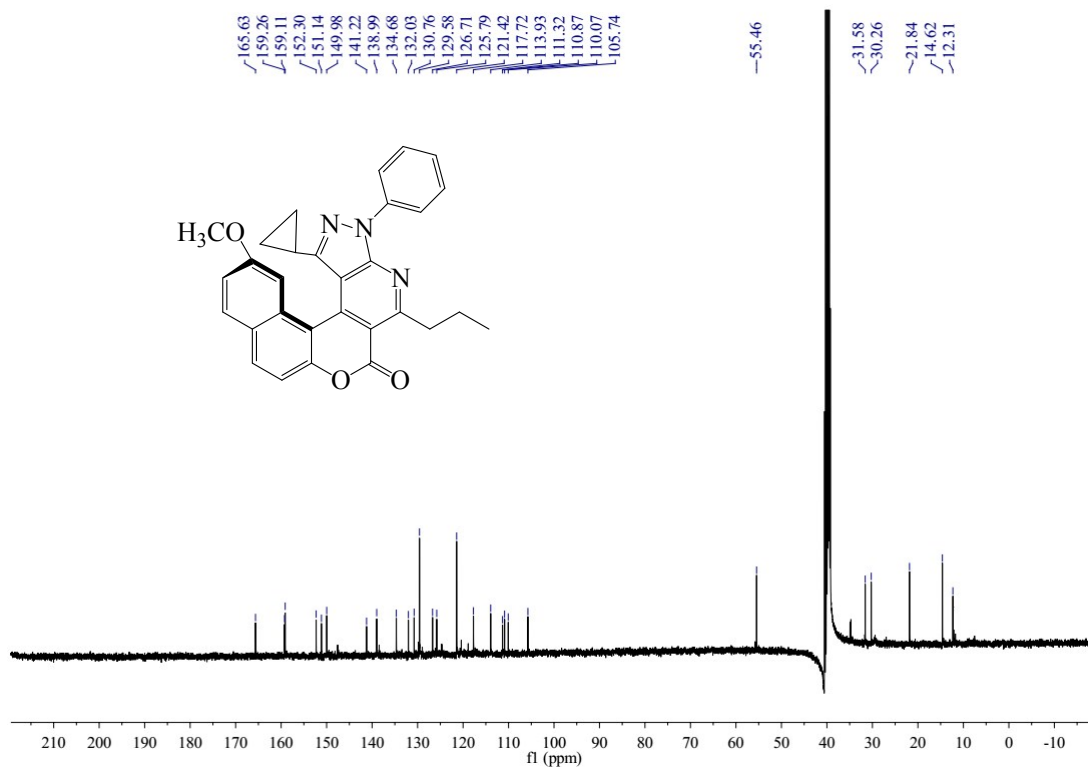

$^1\text{H}$  NMR of 2-isopropyl-11-methyl-13-phenylbenzo[5,6]chromeno[4,3-*d*]pyrazolo[3,4-*b*]pyridin-3(13*H*)-one (**3f**)

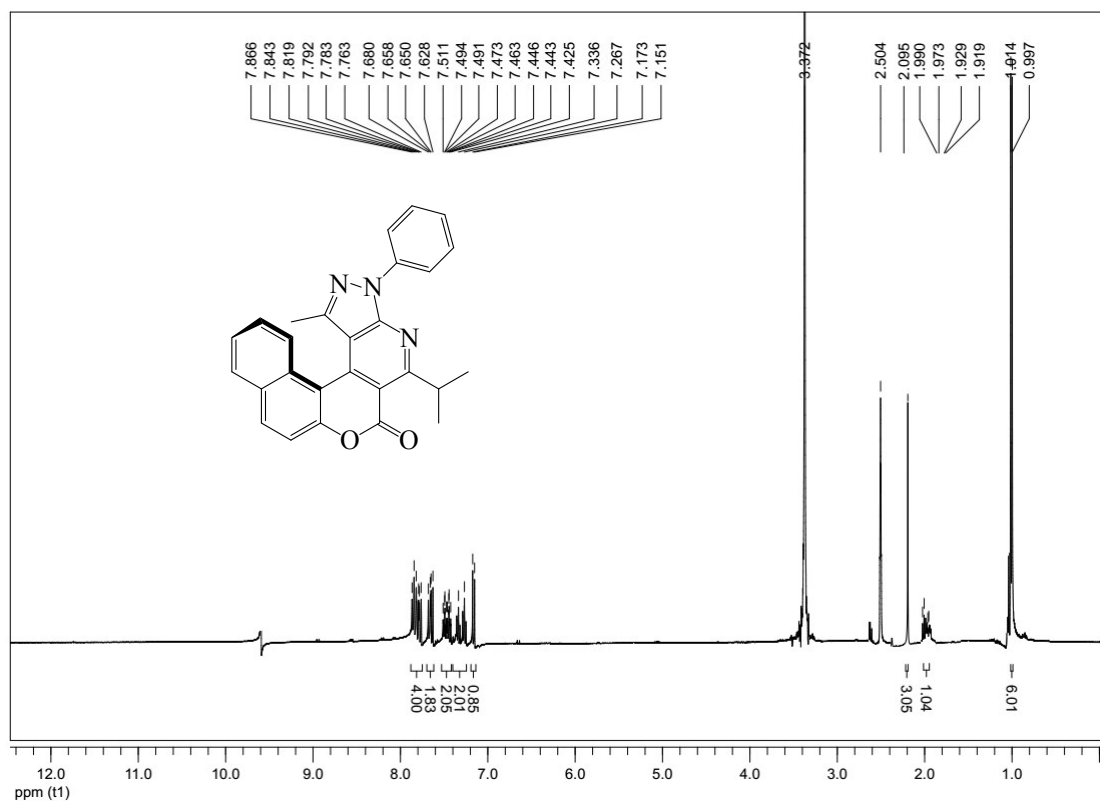

<sup>13</sup>C NMR of 2-isopropyl-11-methyl-13-phenylbenzo[5,6]chromeno[4,3-d]pyrazolo[3,4-b]pyridin-3(13H)-one (**3f**)

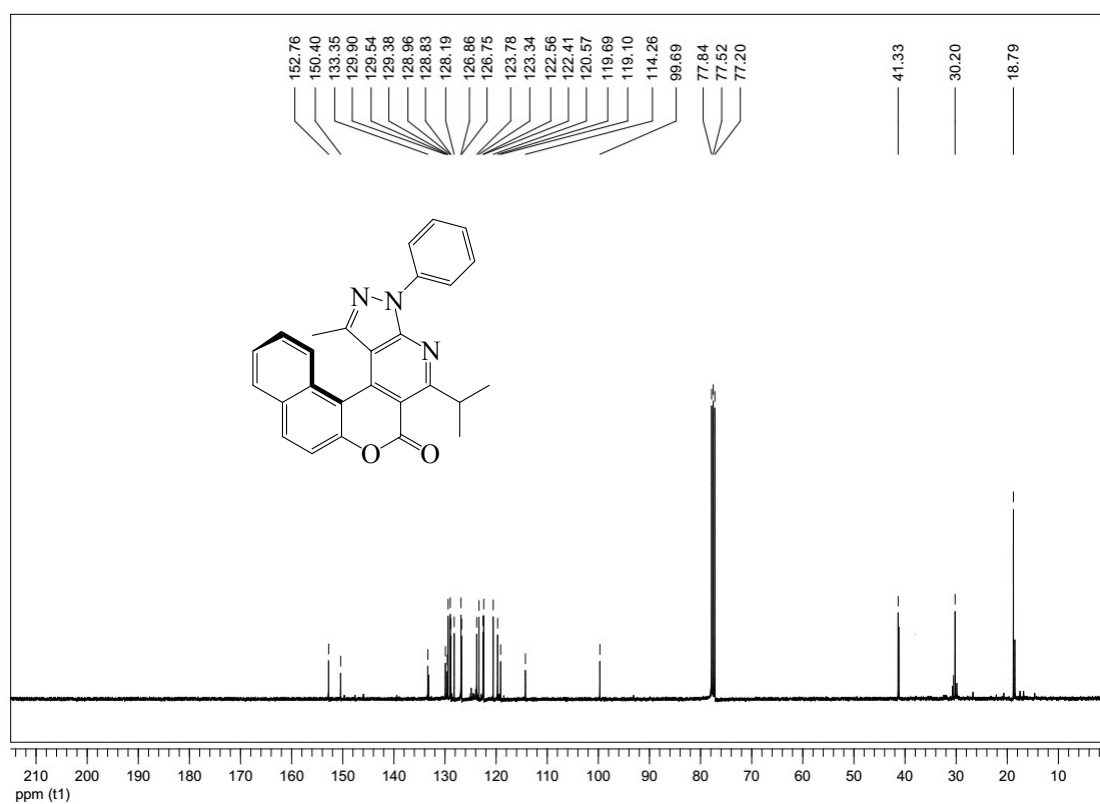

<sup>1</sup>H NMR of 2-isopropyl-9-methoxy-11-methyl-13-phenylbenzo[5,6]chromeno[4,3-d]pyrazolo[3,4-b]pyridin-3(13H)-one (**3g**)

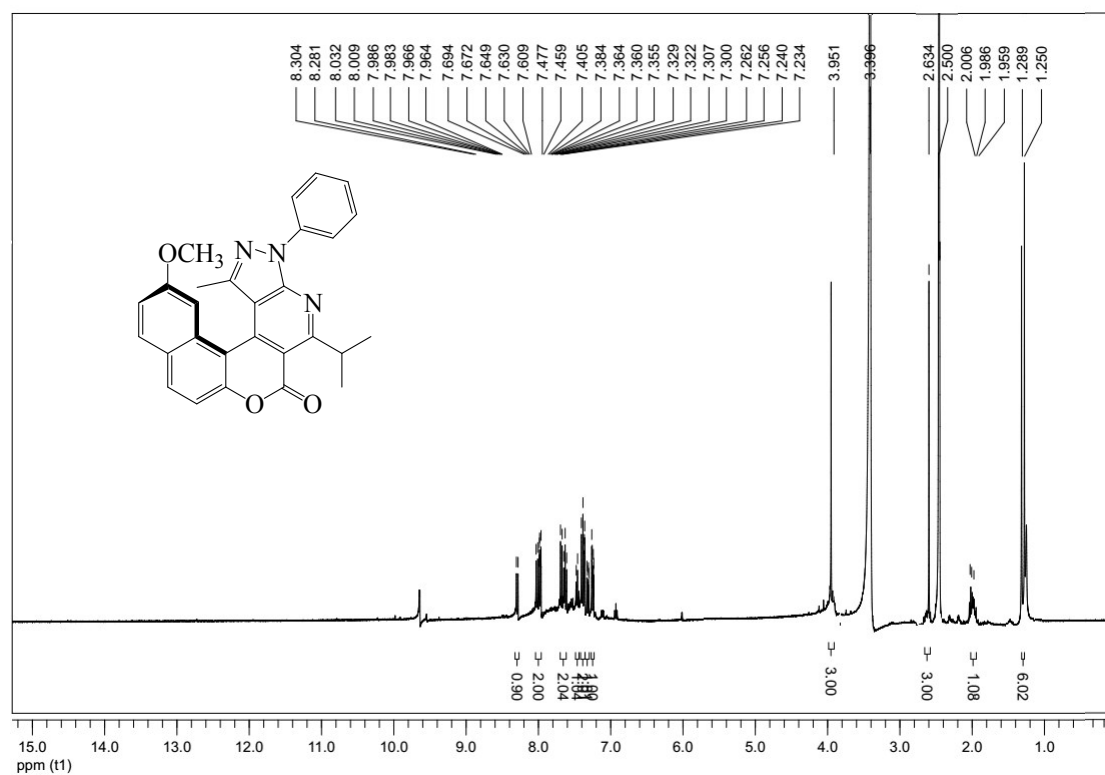

<sup>13</sup>C NMR of 2-isopropyl-9-methoxy-11-methyl-13-phenylbenzo[5,6]chromeno[4,3-d]pyrazolo[3,4-b]pyridin-3(13H)-one (3g)

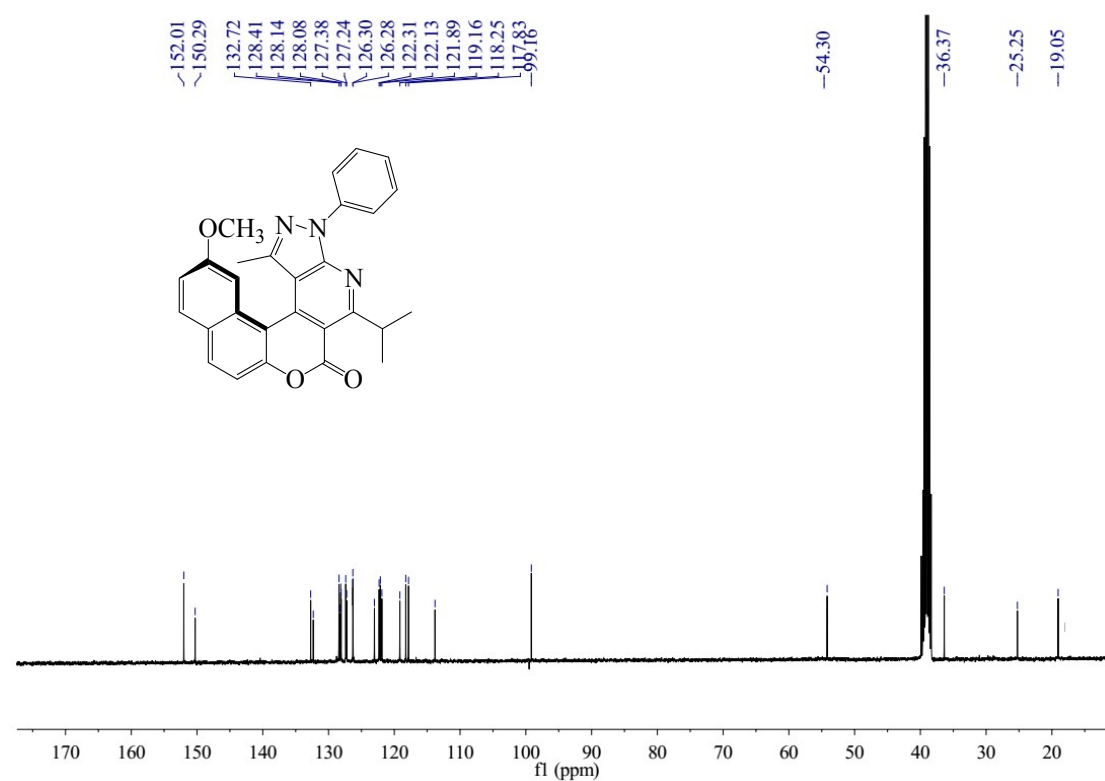

Supporting Information

$^1\text{H}$  NMR of 11-methyl-9-phenyl-12-propyl-9,13-dihydrobenzo[5,6]chromeno[2,3-*b*]pyrazolo[4,3-*e*]pyridine (**4a**)

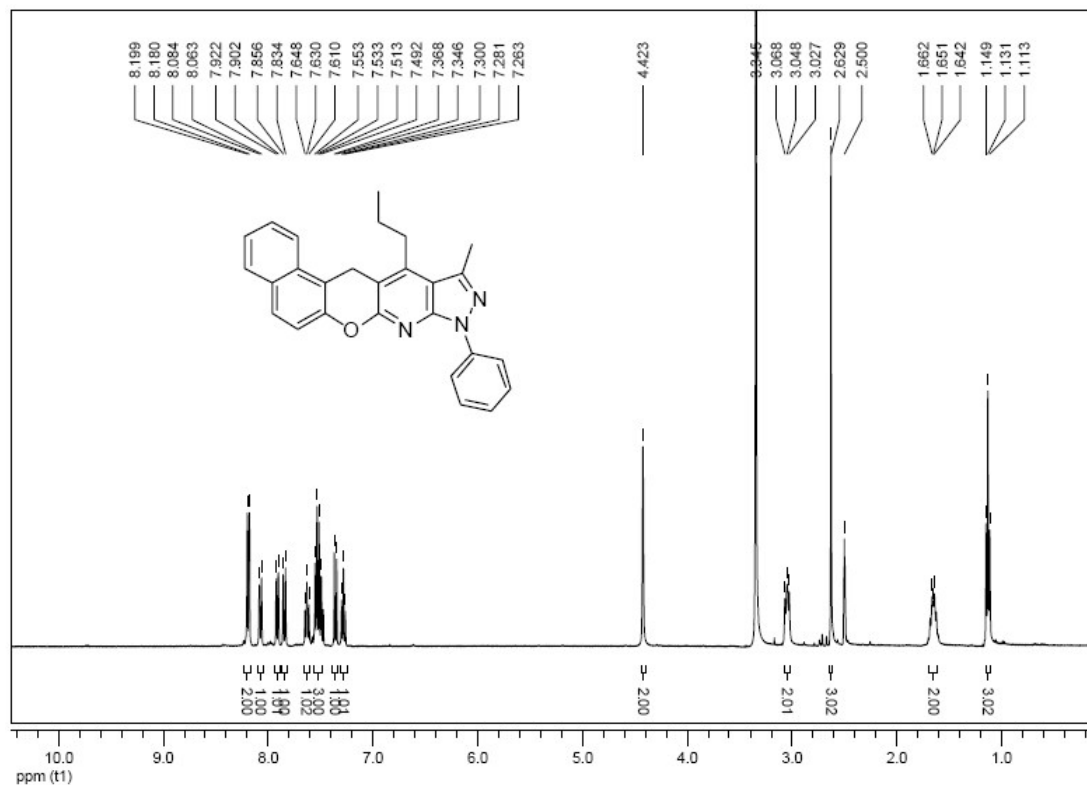

$^{13}\text{C}$  NMR of 11-methyl-9-phenyl-12-propyl-9,13-dihydrobenzo[5,6]chromeno[2,3-*b*]pyrazolo[4,3-*e*]pyridine (**4a**)

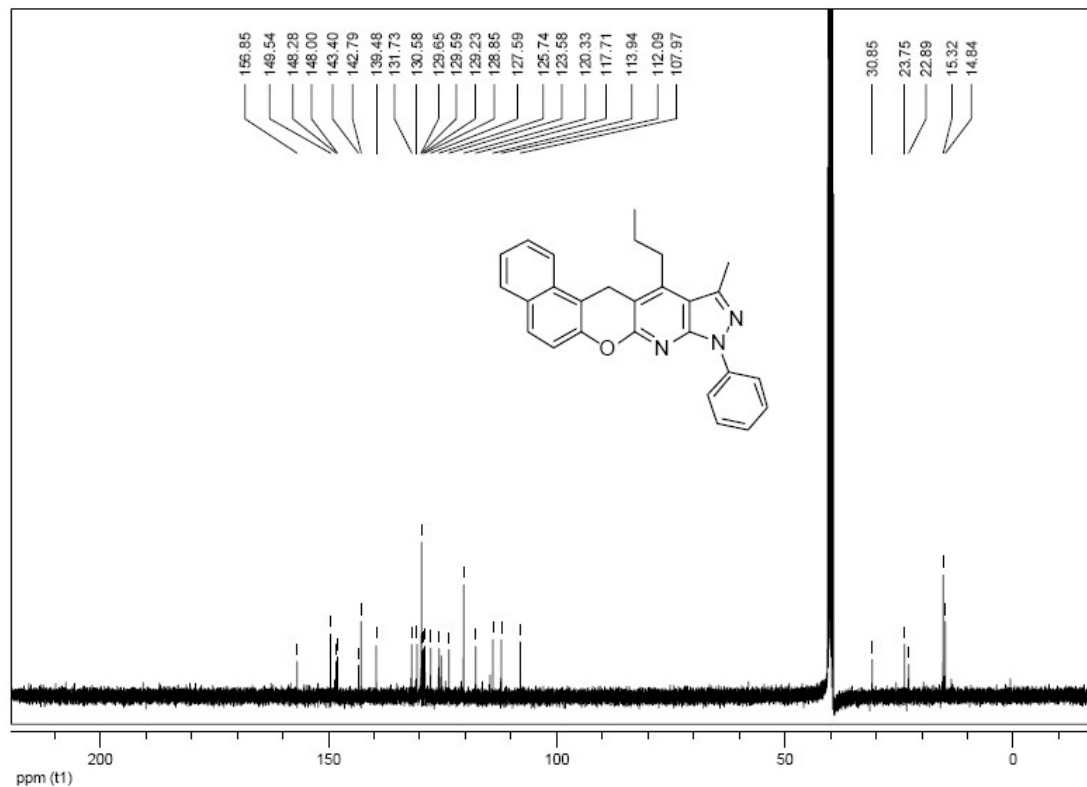

Supporting Information

$^1\text{H}$  NMR of 2-methoxy-11-methyl-9-phenyl-12-propyl-9,13-dihydrobenzo[5,6]chromeno[2,3-*b*]pyrazolo [4,3-*e*]pyridine (**4b**)

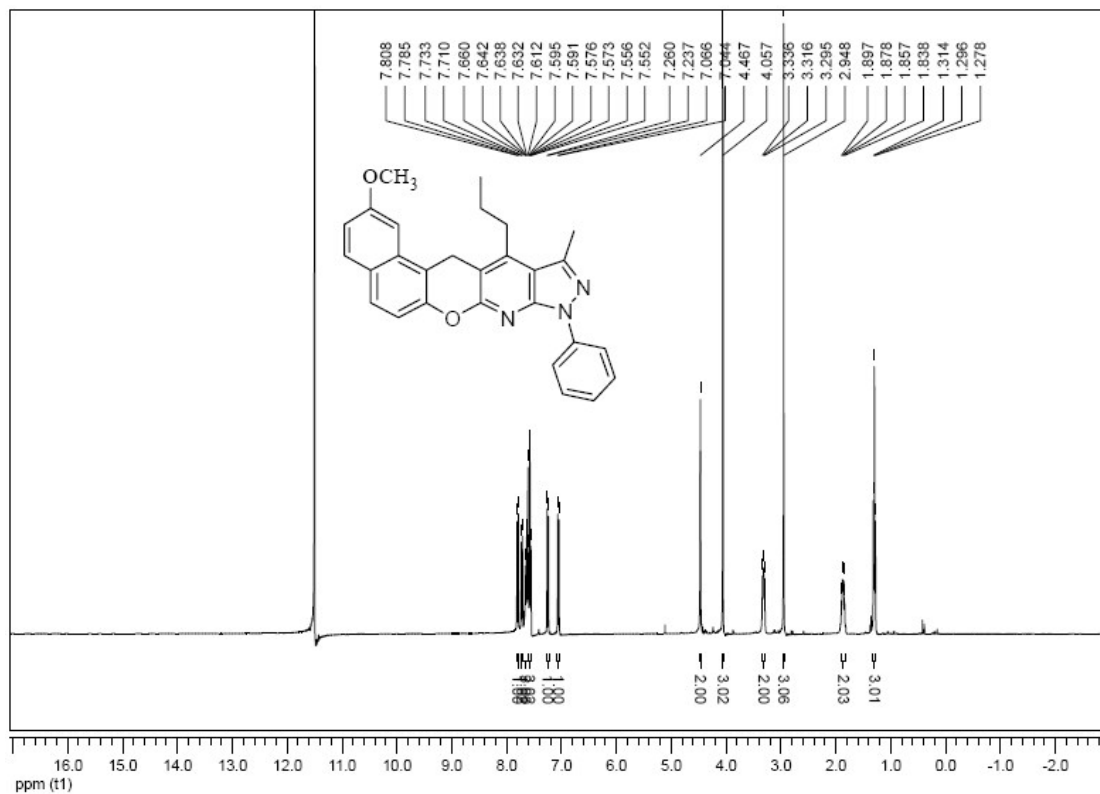

$^{13}\text{C}$  NMR of 2-methoxy-11-methyl-9-phenyl-12-propyl-9,13-dihydrobenzo[5,6]chromeno[2,3-*b*]pyrazolo [4,3-*e*]pyridine (**4b**)

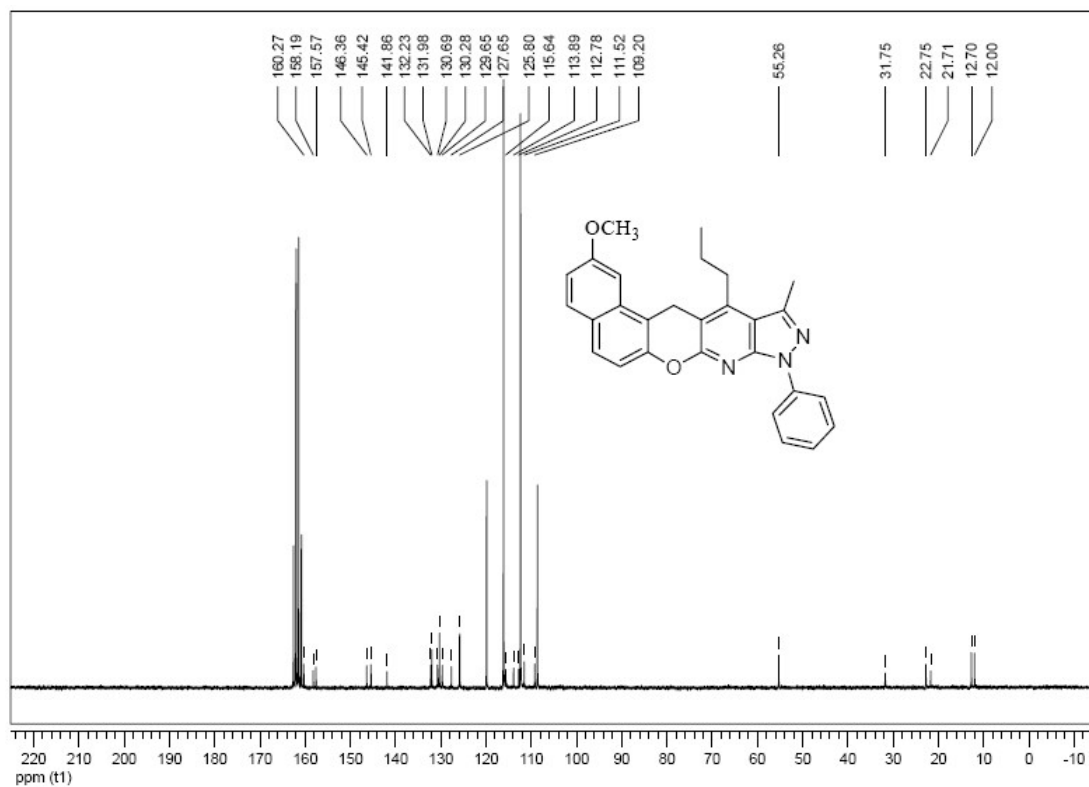



Supporting Information

$^1\text{H}$  NMR of 2-Ethoxy-11-methyl-9-phenyl-12-propyl-9,13-dihydrobenzo[5,6]chromeno[2,3-*b*]pyrazolo[4,3-*e*]pyridine (**4c**)

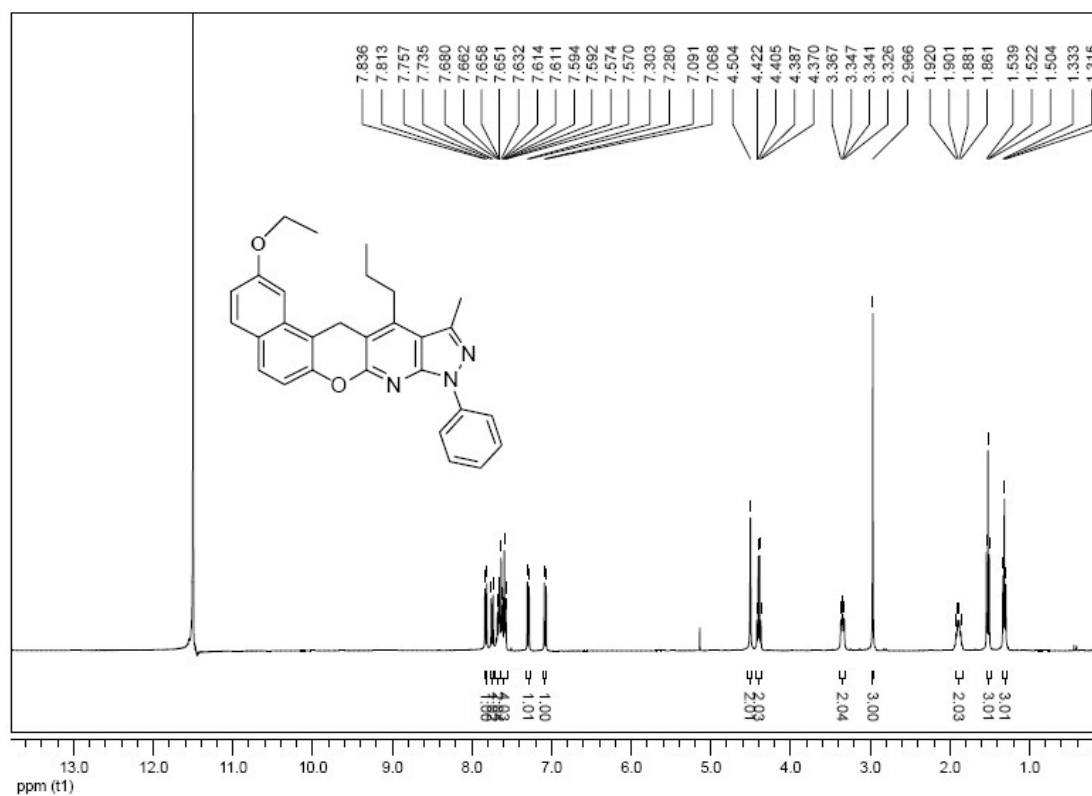

$^{13}\text{C}$  NMR of 2-Ethoxy-11-methyl-9-phenyl-12-propyl-9,13-dihydrobenzo[5,6]chromeno[2,3-*b*]pyrazolo[4,3-*e*]pyridine (**4c**)

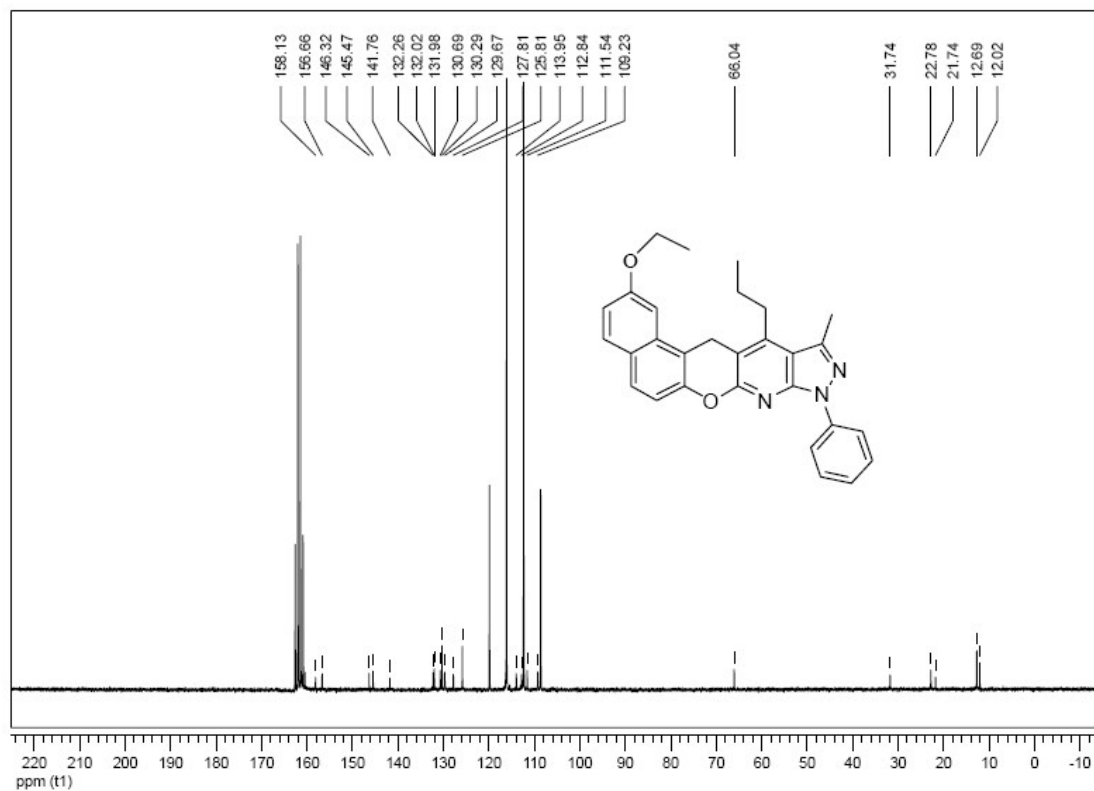

Supporting Information

$^1\text{H}$  NMR of 11,12-dimethyl-9-phenyl-9,13-dihydrobenzo[5,6]chromeno[2,3-*b*]pyrazolo[4,3-*e*]pyridine (**4d**)

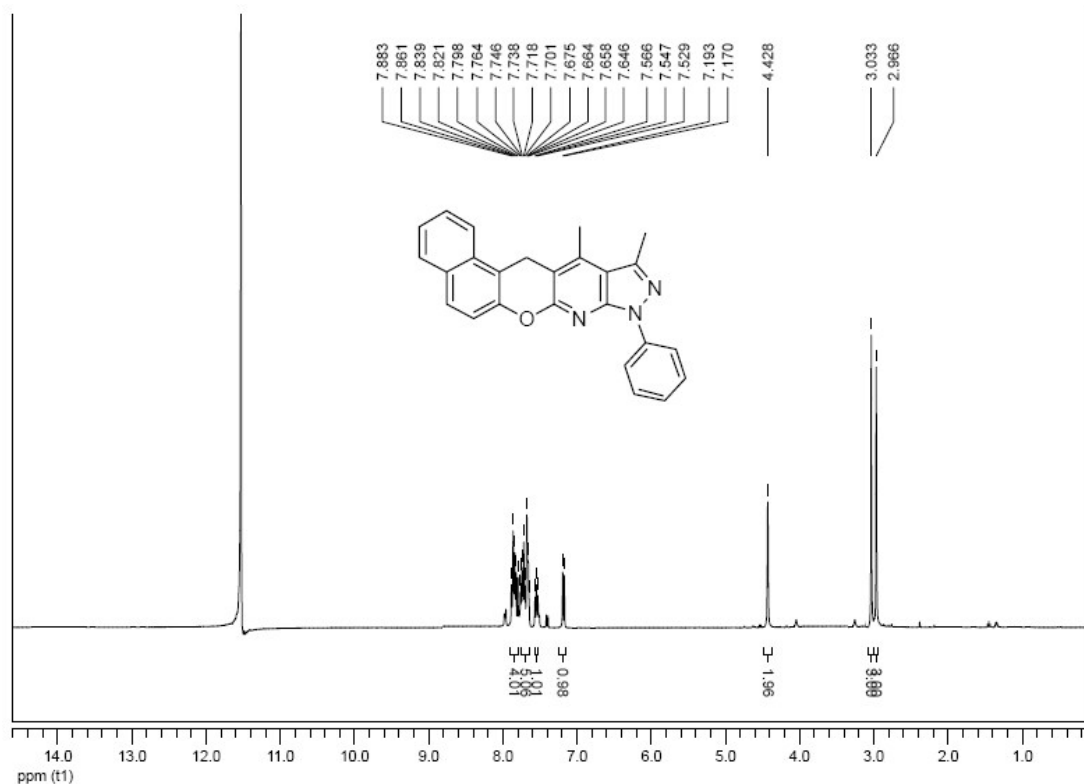

$^{13}\text{C}$  NMR of 11,12-dimethyl-9-phenyl-9,13-dihydrobenzo[5,6]chromeno[2,3-*b*]pyrazolo[4,3-*e*]pyridine (**4d**)

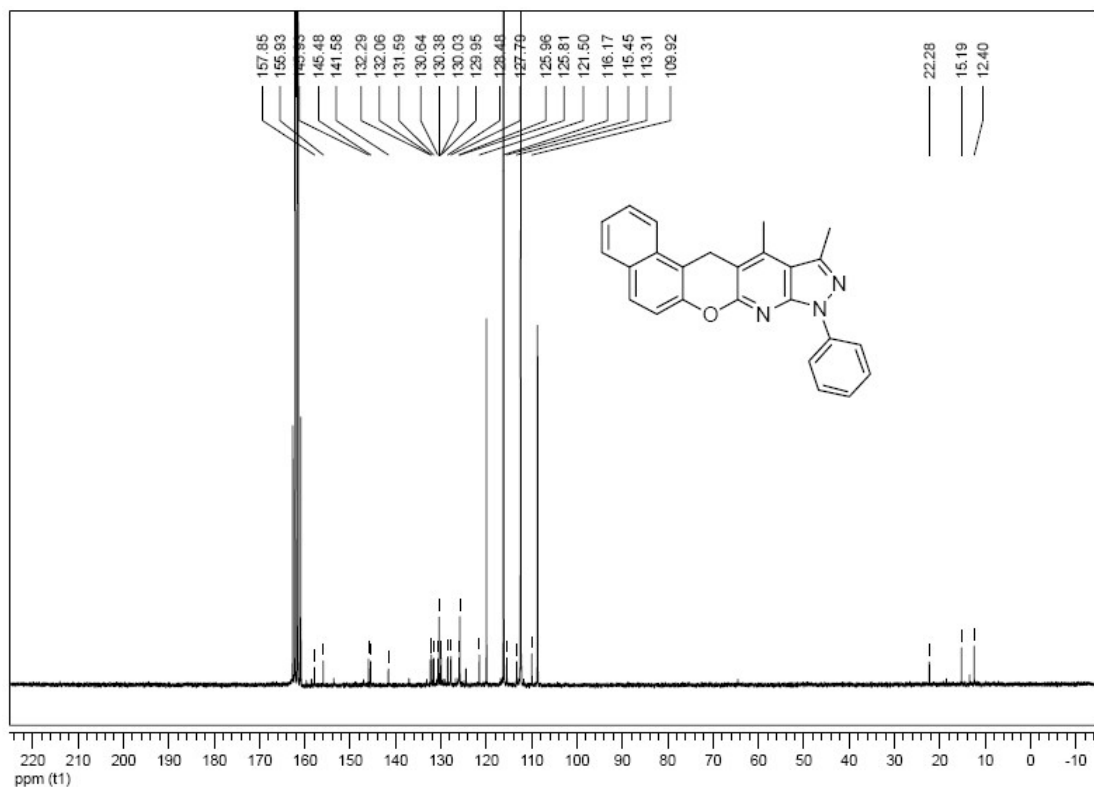

Supporting Information

$^1\text{H}$  NMR of 2-methoxy-11,12-dimethyl-9-phenyl-9,13-dihydrobenzo[5,6]chromeno[2,3-*b*]pyrazolo[4,3-*e*]pyridine (**4e**)

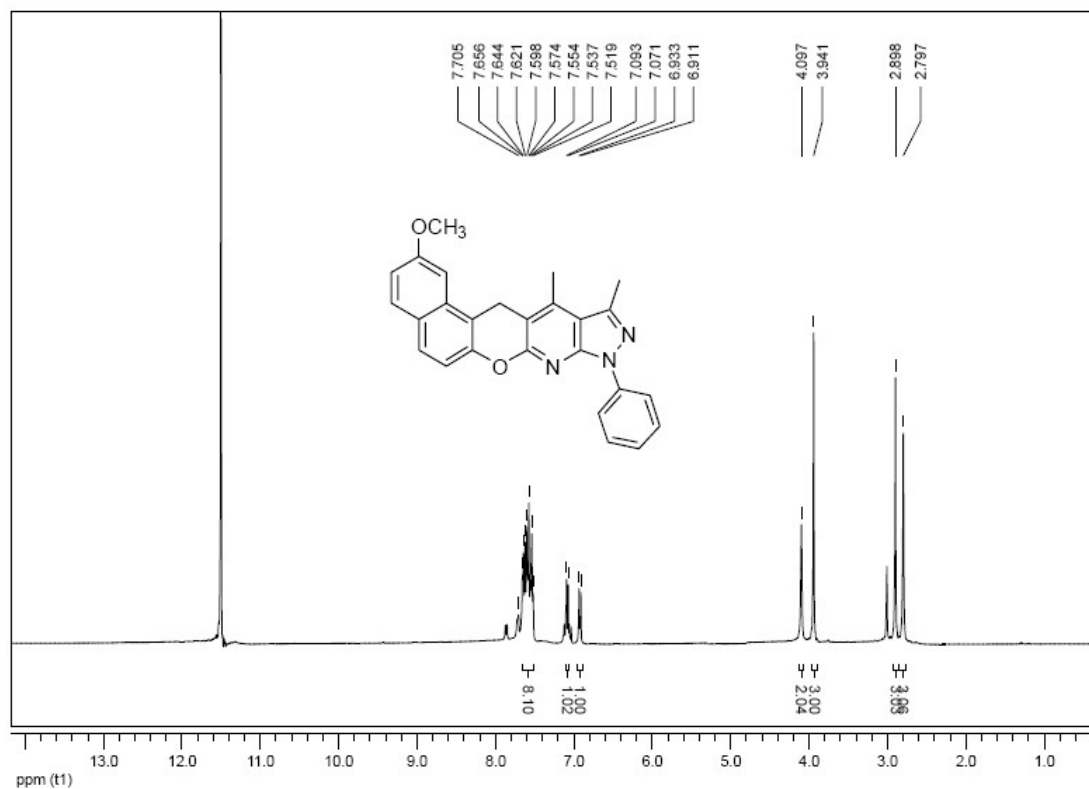

$^{13}\text{C}$  NMR of 2-methoxy-11,12-dimethyl-9-phenyl-9,13-dihydrobenzo[5,6]chromeno[2,3-*b*]pyrazolo[4,3-*e*]pyridine (**4e**)

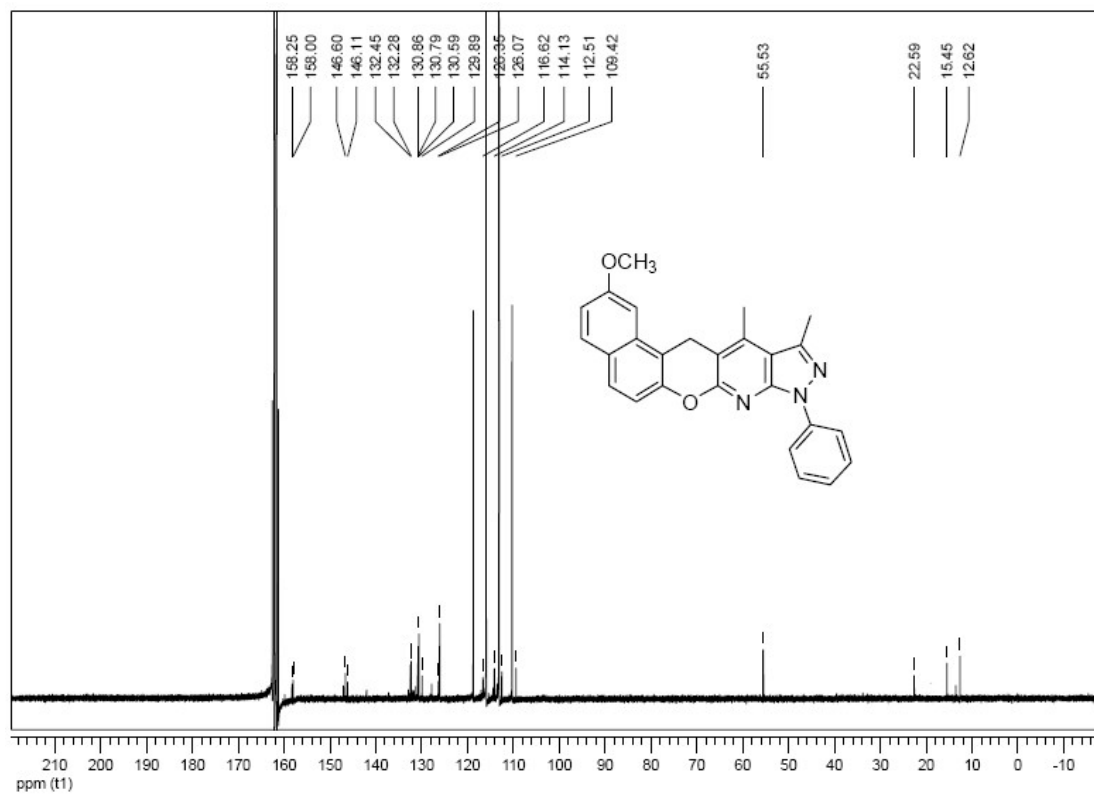

Supporting Information

$^1\text{H}$  NMR of 12-ethyl-11-methyl-9-phenyl-9,13-dihydrobenzo[5,6]chromeno[2,3-*b*]pyrazolo[4,3-*e*]pyridine(**4f**)

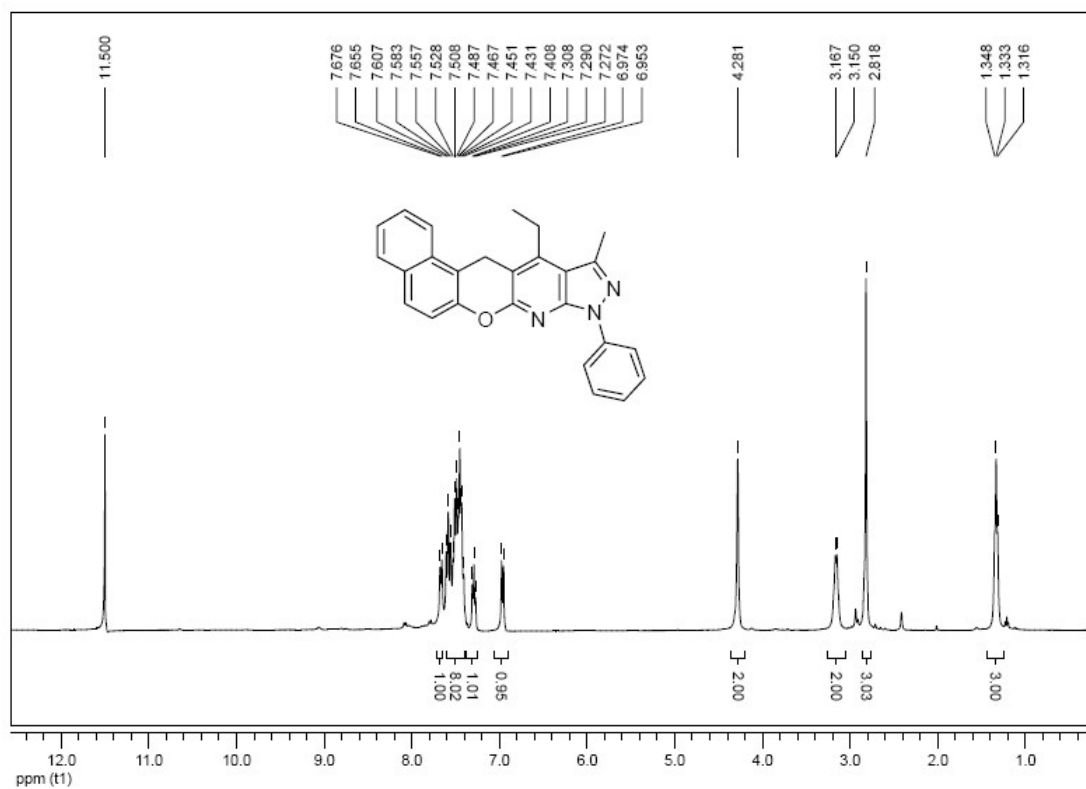

$^{13}\text{C}$  NMR of 12-ethyl-11-methyl-9-phenyl-9,13-dihydrobenzo[5,6]chromeno[2,3-*b*]pyrazolo[4,3-*e*]pyridine(**4f**)

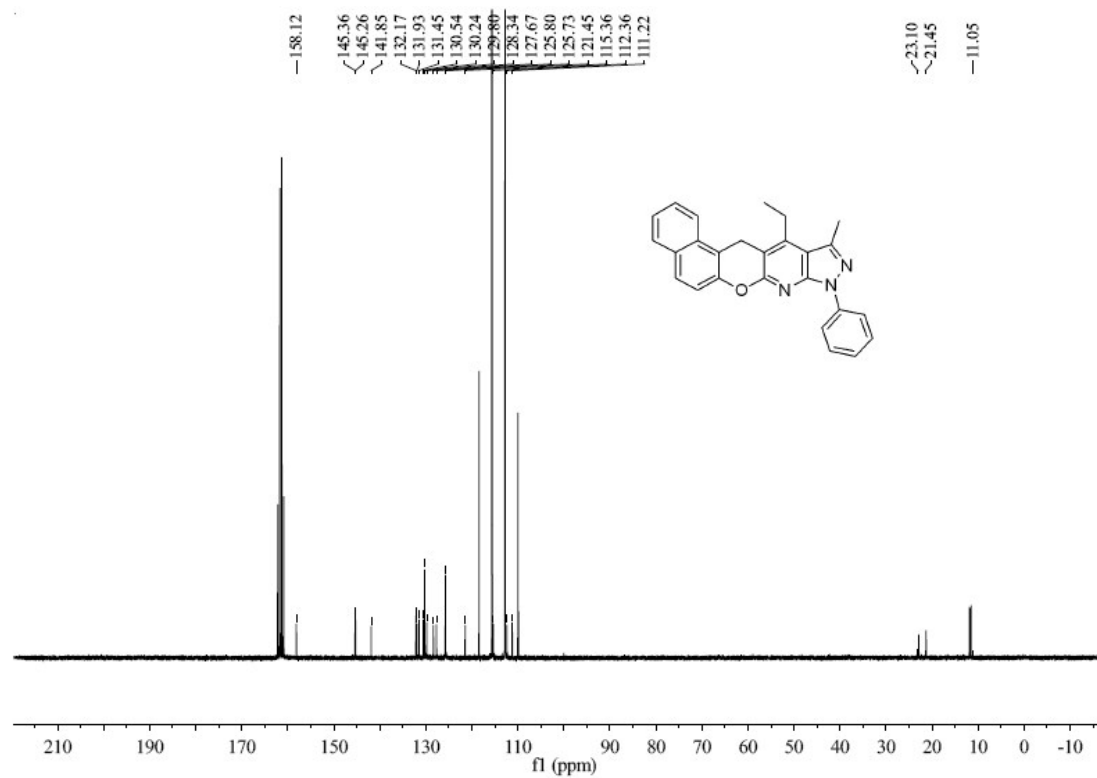

Supporting Information

<sup>1</sup>H NMR of 9,11-Diphenyl-12-propyl-9,13-dihydrobenzo[5,6]chromeno[2,3-*b*]pyrazolo[4,3-*e*]pyridine (**4g**)

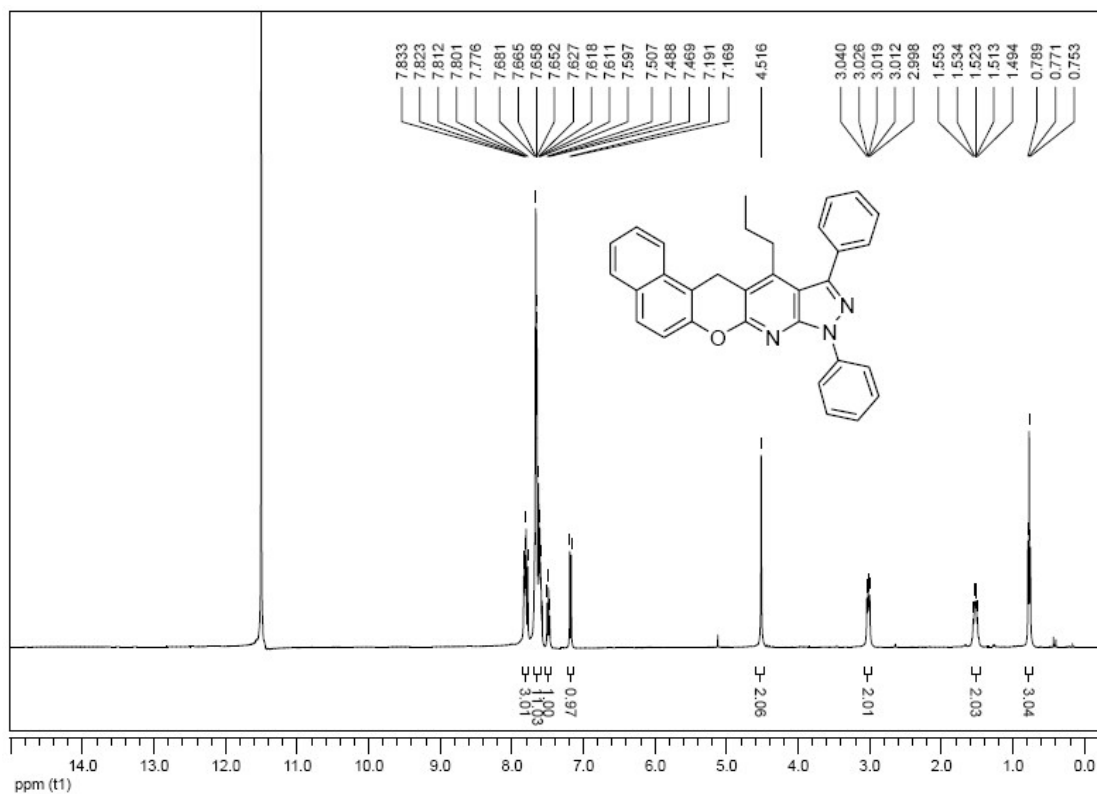

<sup>13</sup>C NMR of 9,11-Diphenyl-12-propyl-9,13-dihydrobenzo[5,6]chromeno[2,3-*b*]pyrazolo[4,3-*e*]pyridine (**4g**)

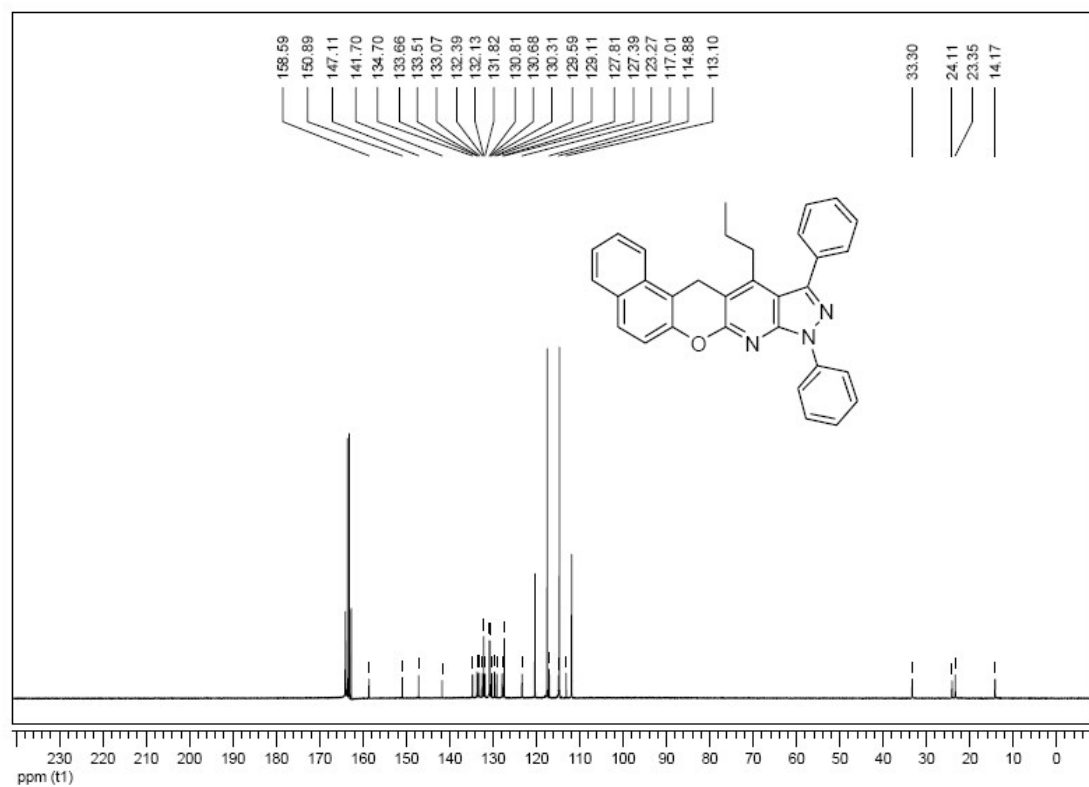

Supporting Information

$^1\text{H}$  NMR of 2-methoxy-9,11-diphenyl-12-propyl-9,13-dihydrobenzo[5,6]chromeno[2,3-*b*]pyrazolo[4,3-*e*]pyridine (**4h**)

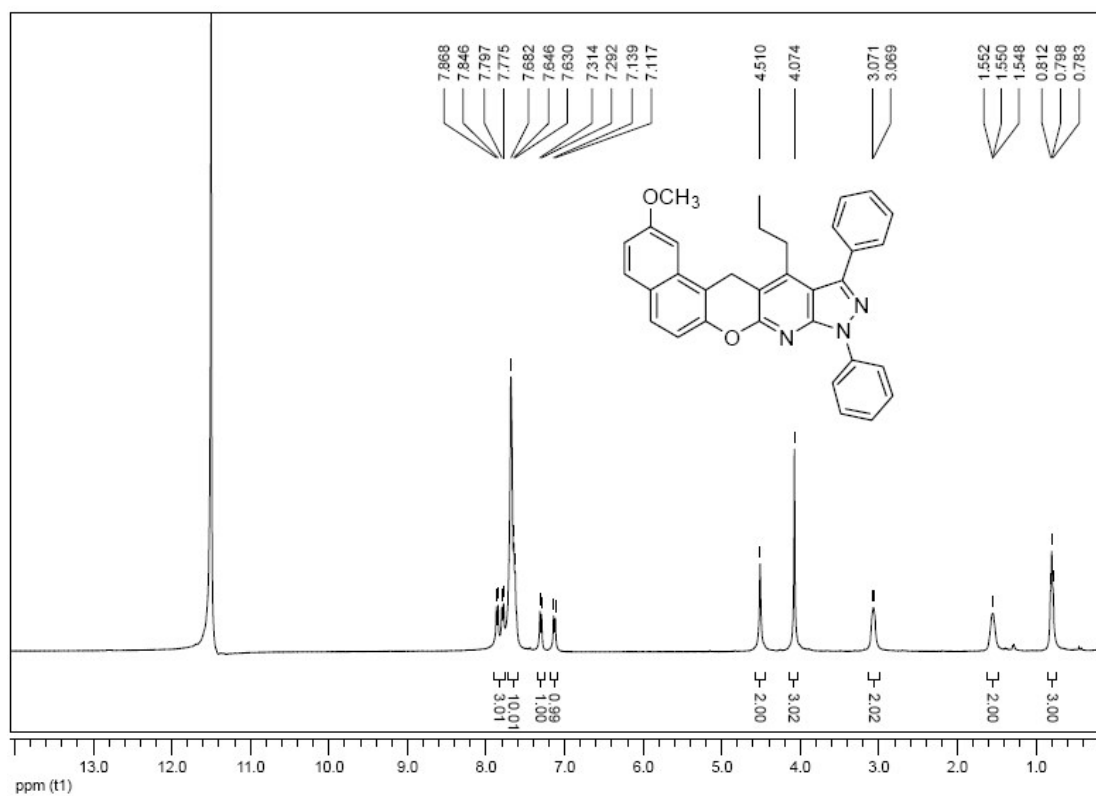

$^{13}\text{C}$  NMR of 2-methoxy-9,11-diphenyl-12-propyl-9,13-dihydrobenzo[5,6]chromeno[2,3-*b*]pyrazolo[4,3-*e*]pyridine (**4h**)

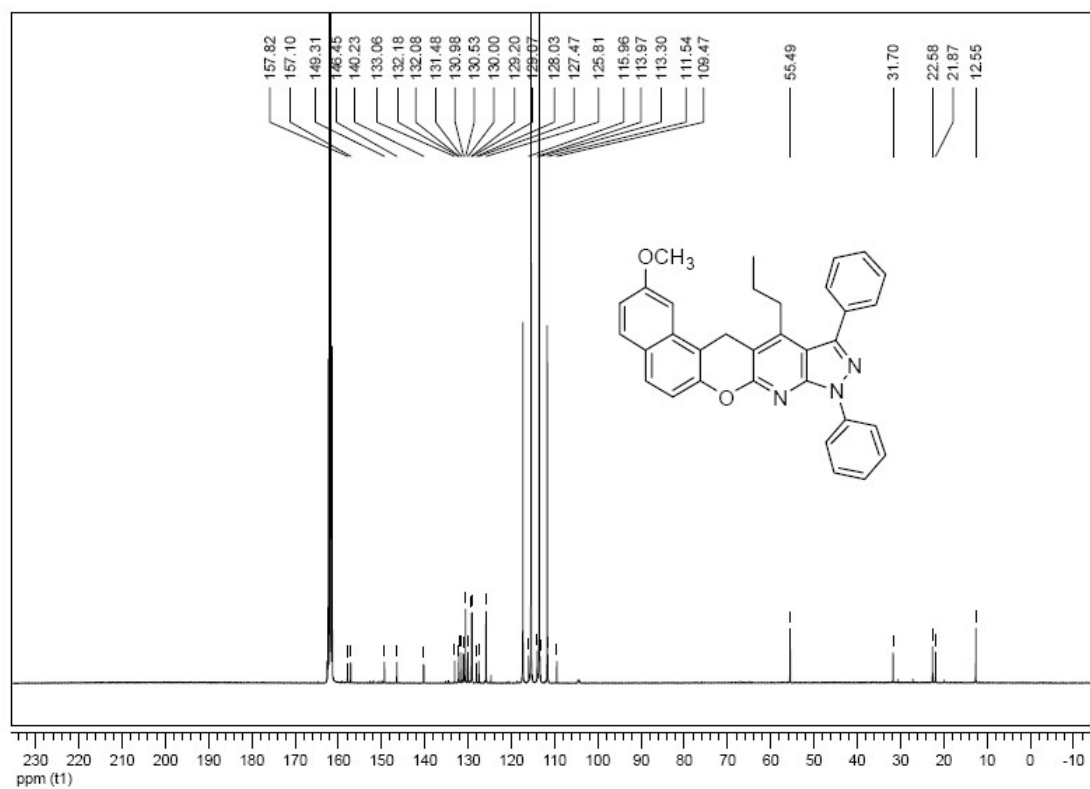

Supporting Information

<sup>1</sup>H NMR of 2-ethoxy-9,11-diphenyl-12-propyl-9,13-dihydrobenzo[5,6]chromeno[2,3-b]pyrazolo [4,3-e]pyridine (**4i**)

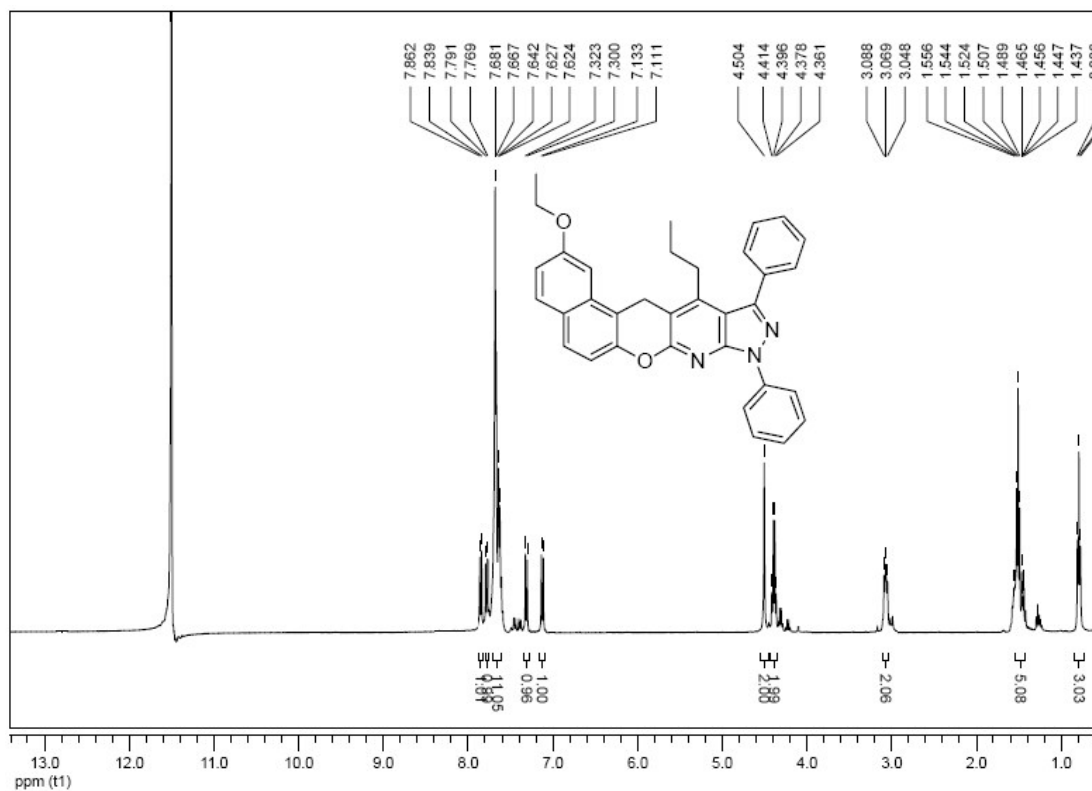

<sup>13</sup>C NMR of 2-ethoxy-9,11-diphenyl-12-propyl-9,13-dihydrobenzo[5,6]chromeno[2,3-b]pyrazolo [4,3-e]pyridine (**4i**)

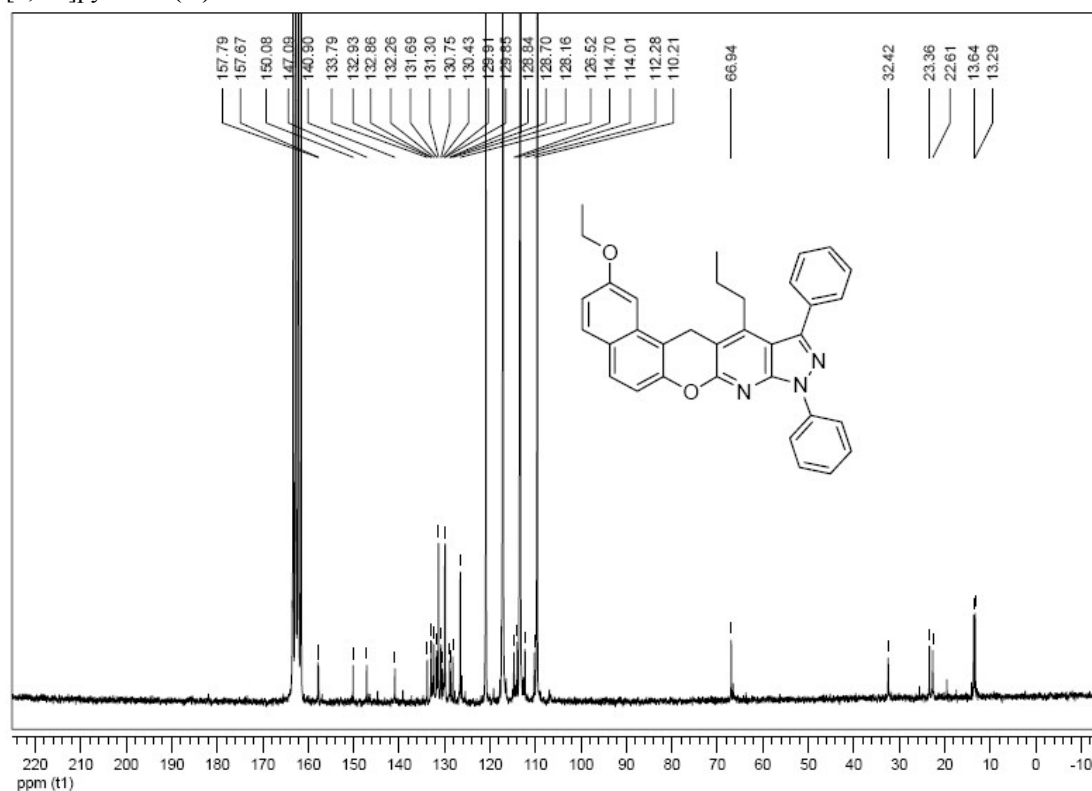

Supporting Information

<sup>1</sup>H NMR of 12-methyl-9,11-diphenyl-9,13-dihydrobenzo[5,6]chromeno[2,3-*b*]pyrazolo[4,3-*e*]pyridine (**4j**)

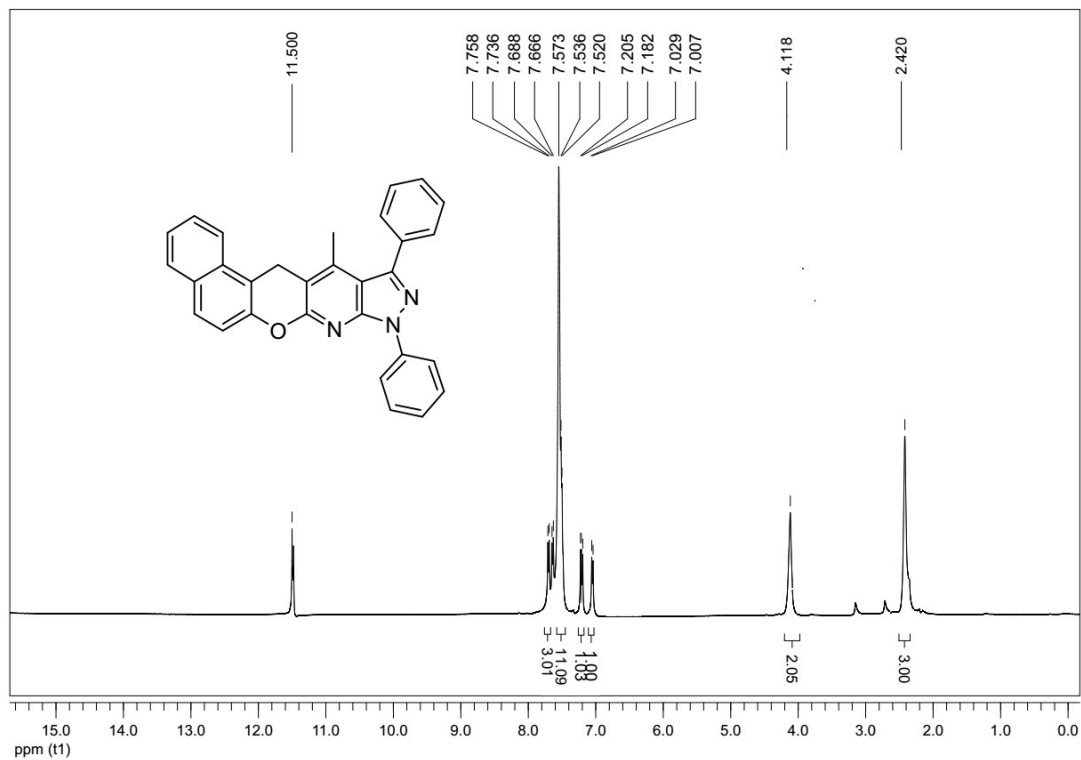

<sup>13</sup>C NMR of 12-methyl-9,11-diphenyl-9,13-dihydrobenzo[5,6]chromeno[2,3-*b*]pyrazolo[4,3-*e*]pyridine (**4j**)

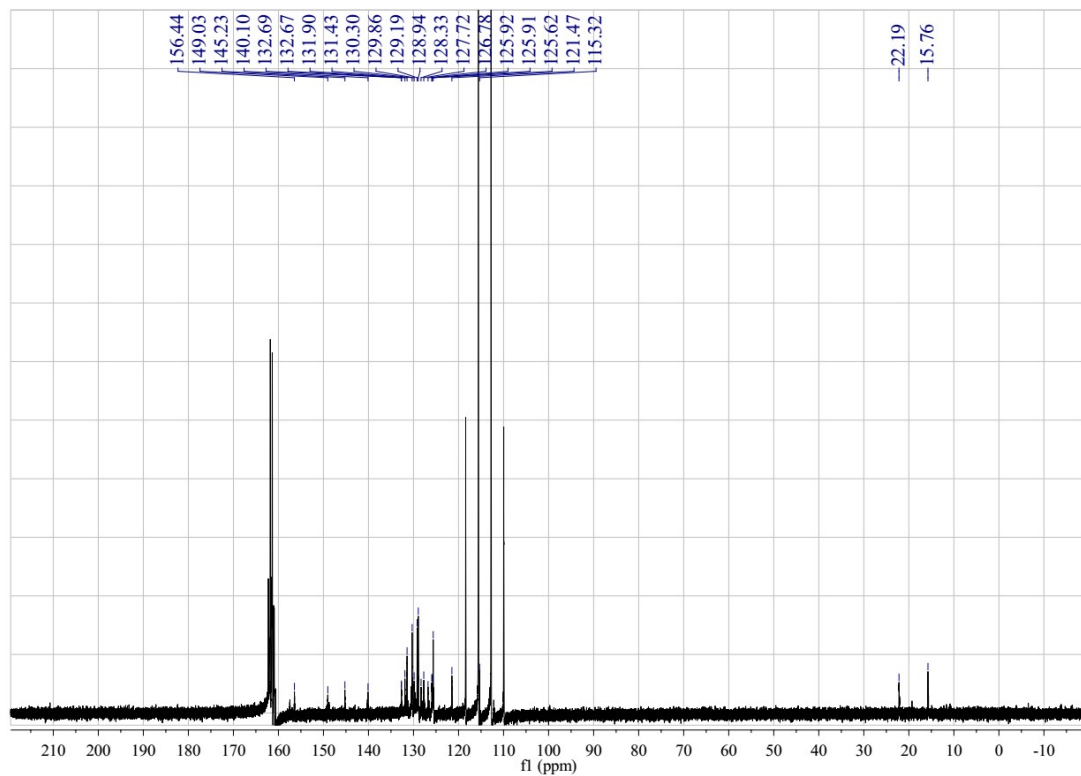



Supporting Information

$^1\text{H}$  NMR of 2-methoxy-12-methyl-9,11-diphenyl-9,13-dihydrobenzo[5,6]chromeno[2,3-*b*]pyrazolo [4,3-*e*]pyridine (**4k**)

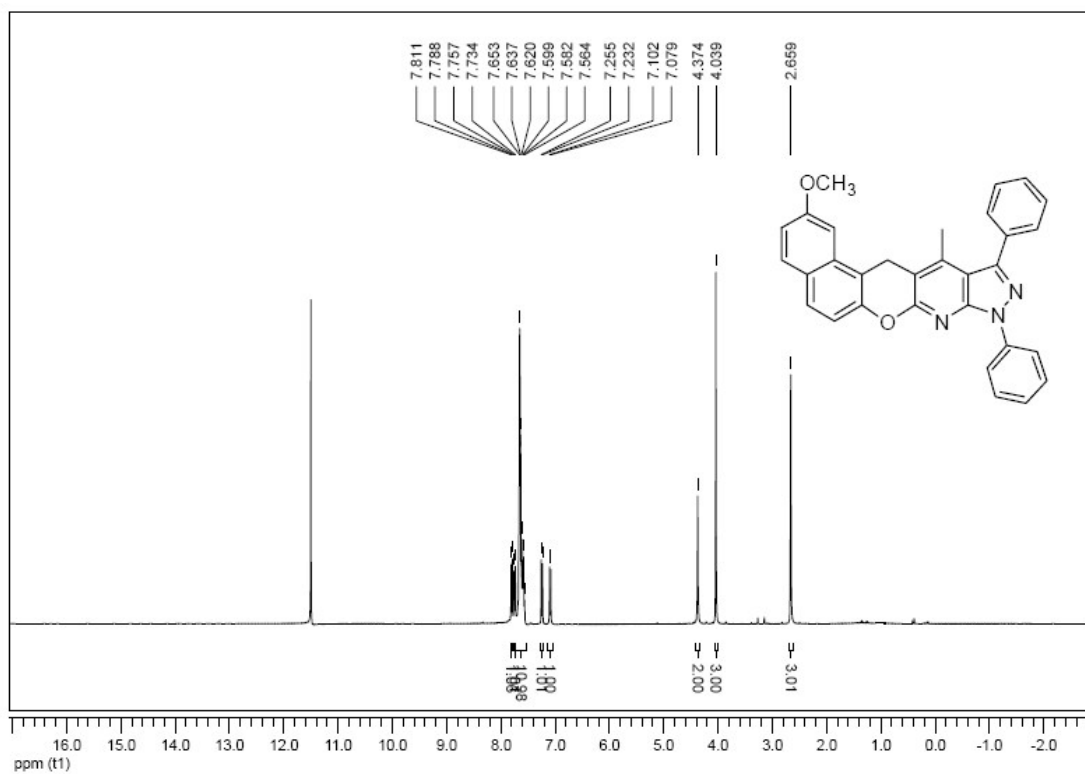

$^{13}\text{C}$  NMR of 2-methoxy-12-methyl-9,11-diphenyl-9,13-dihydrobenzo[5,6]chromeno[2,3-*b*]pyrazolo [4,3-*e*]pyridine (**4k**)

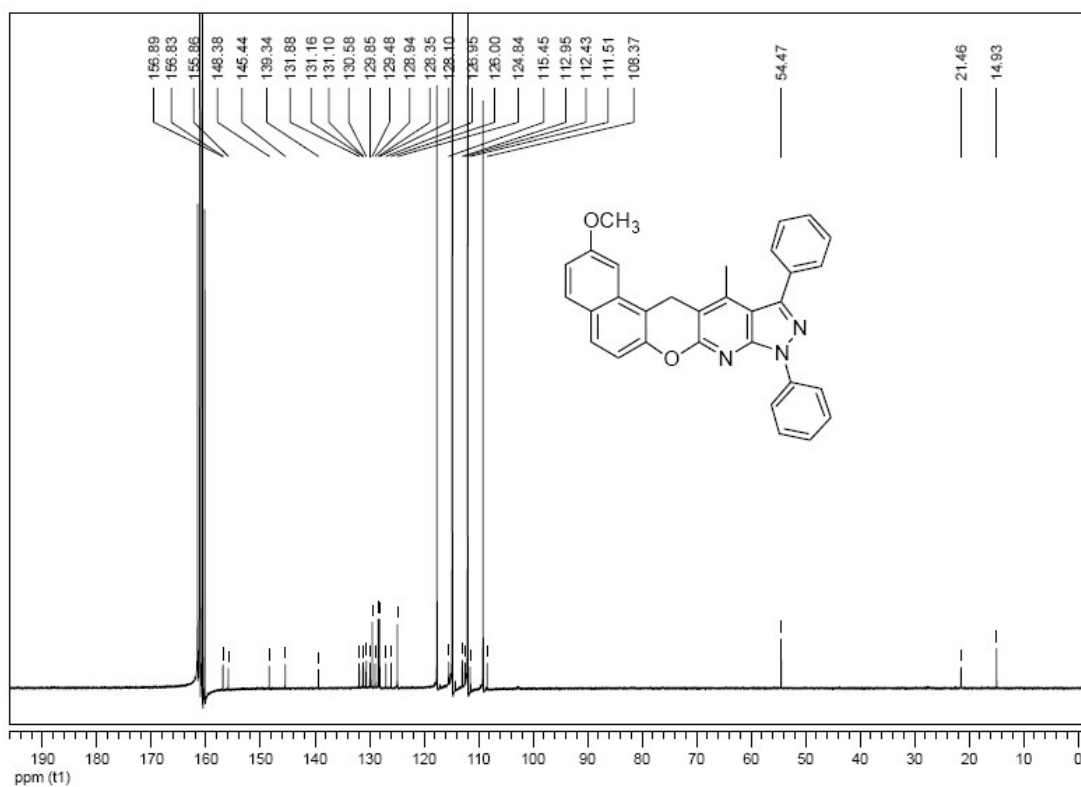

Supporting Information

<sup>1</sup>H NMR of 12-ethyl-9,11-diphenyl-9,13-dihydrobenzo[5,6]chromeno[2,3-*b*]pyrazolo[4,3-*e*]pyridine (**41**)

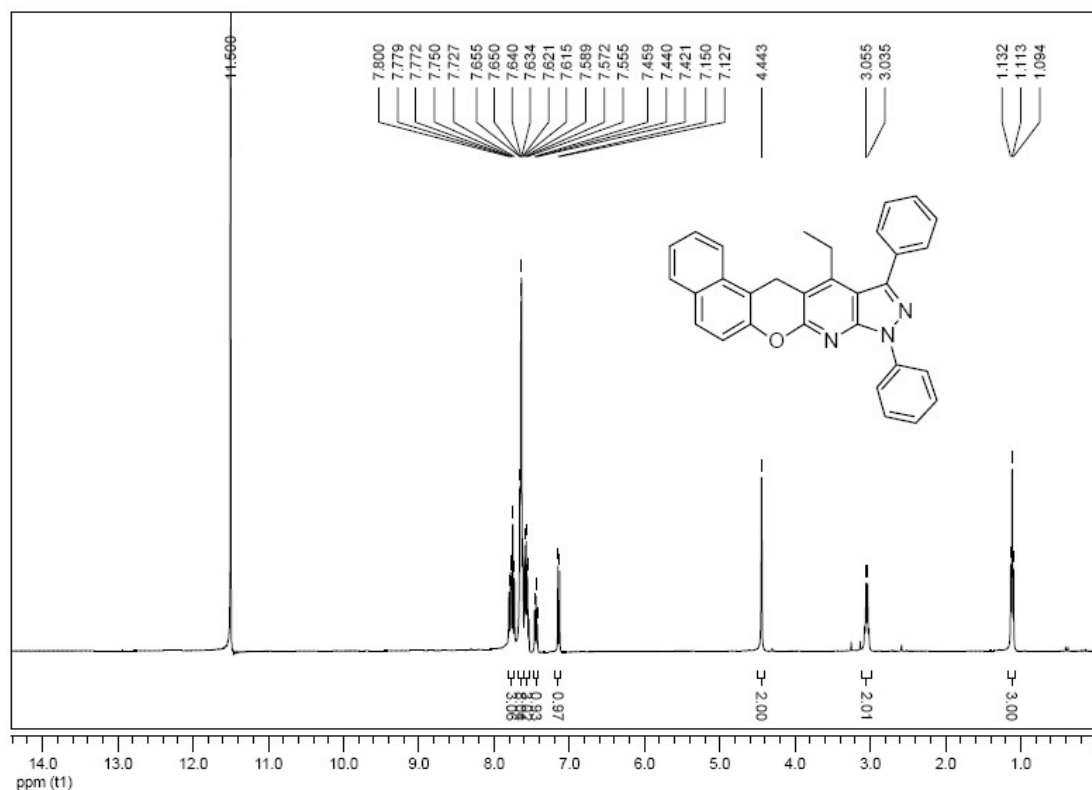

<sup>13</sup>C NMR of 12-ethyl-9,11-diphenyl-9,13-dihydrobenzo[5,6]chromeno[2,3-*b*]pyrazolo[4,3-*e*]pyridine (**41**)

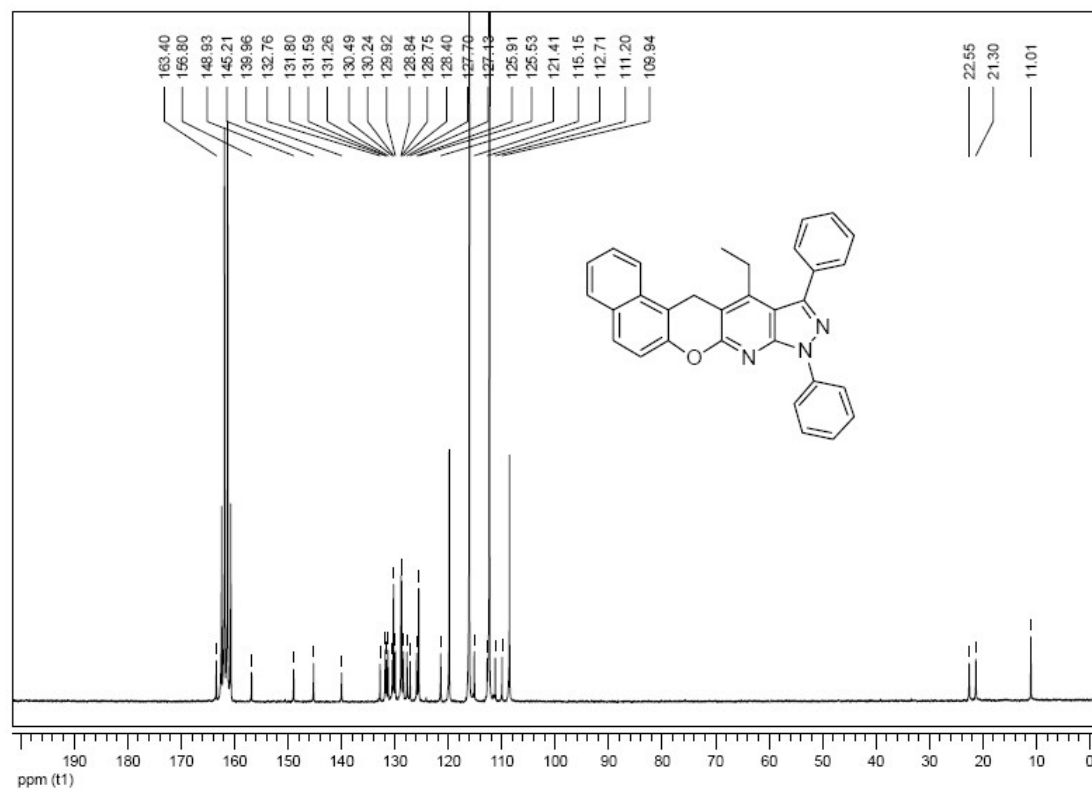

Supporting Information

$^1\text{H}$  NMR of 9-methyl-11-phenyl-12-propyl-9,13-dihydrobenzo[5,6]chromeno[2,3-*b*]pyrazolo[4,3-*e*]pyridine (**4m**)

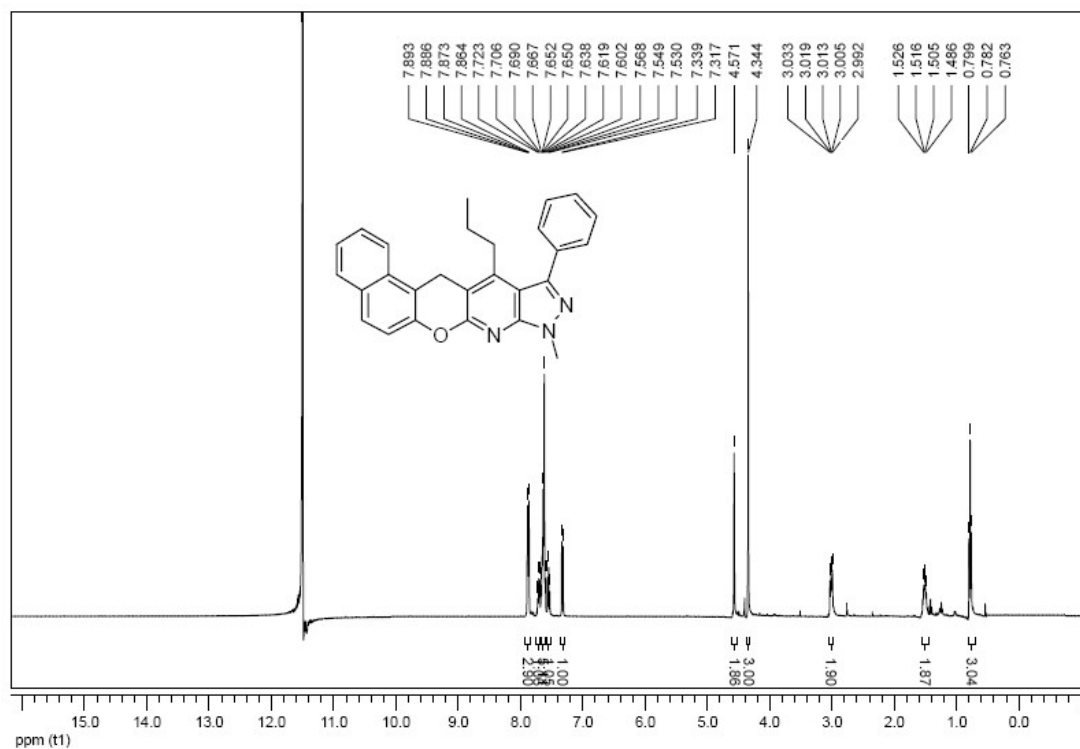

$^{13}\text{C}$  NMR of 9-methyl-11-phenyl-12-propyl-9,13-dihydrobenzo[5,6]chromeno[2,3-*b*]pyrazolo[4,3-*e*]pyridine (**4m**)

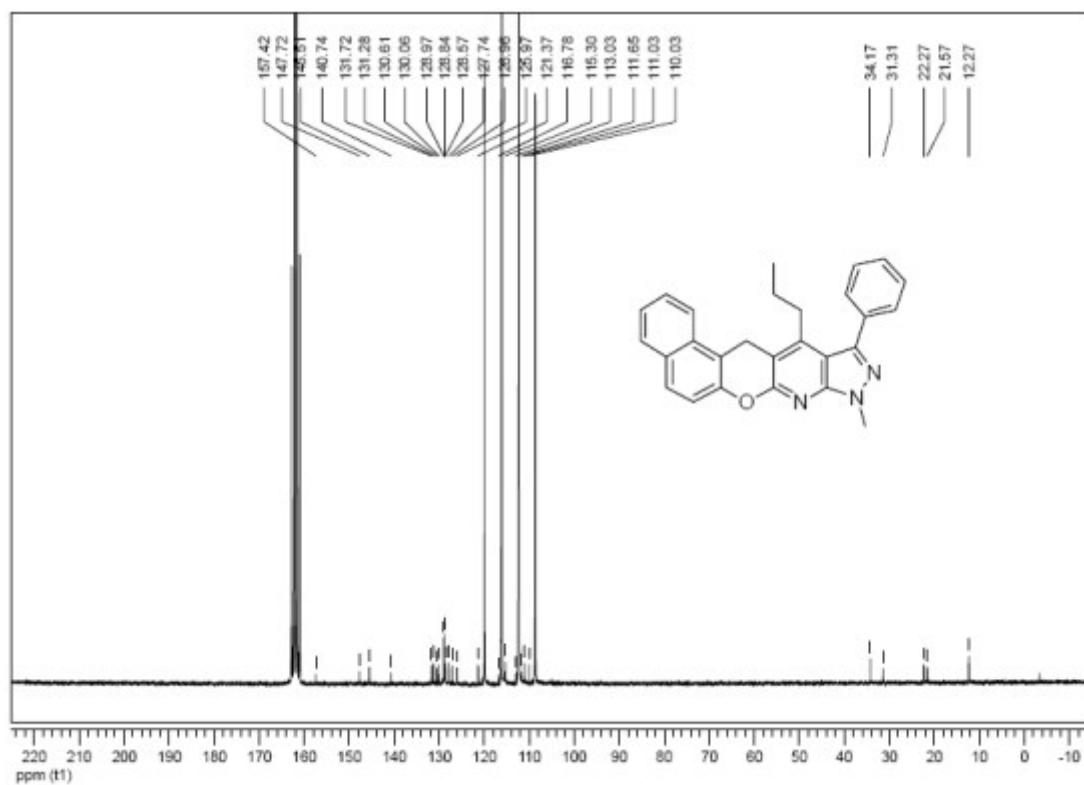

Supplement: c7ob01742a1.pdf [file c7ob01742a1.pdf]
